# Supplementary material
Source: Elsevier journal article supplement (https://natap.org/2017/HIV/mmc1.pdf)
Supplement: mmc1 [file mmc1.pdf]

# THE LANCET

## Supplementary appendix

This appendix formed part of the original submission and has been peer reviewed. We post it as supplied by the authors.

Supplement to: Miller V, Mente A, Dehghan M, et al, on behalf of the Prospective Urban Rural Epidemiology (PURE) study investigator. Fruit, vegetable, and legume intake, and cardiovascular disease and deaths in 18 countries (Prospective Urban Rural Epidemiology [PURE]): a prospective cohort study. *Lancet* 2017; published online Aug 29. [http://dx.doi.org/10.1016/S0140-6736\(17\)32253-5](http://dx.doi.org/10.1016/S0140-6736(17)32253-5).

## Supplementary Appendix

|                                                                                                                                                                                |       |
|--------------------------------------------------------------------------------------------------------------------------------------------------------------------------------|-------|
| Supplementary Methods: PURE study participant selection methodology.....                                                                                                       | 3     |
| Supplementary Methods: Representativeness of the PURE cohort.....                                                                                                              | 4     |
| Supplementary Table 1: PURE baseline response rates by country and urban/rural location.....                                                                                   | 5     |
| Supplementary Table 2: Median duration of follow-up in years by country.....                                                                                                   | 6     |
| Supplementary Figure 1: Flowchart of participants in the PURE Study.....                                                                                                       | 7     |
| Supplementary Table 3: Classification of PURE countries into geographic regions.....                                                                                           | 8     |
| Supplementary Methods: Methodology used for estimating dietary intake.....                                                                                                     | 9     |
| Supplementary Methods: Food composition database compilation.....                                                                                                              | 10    |
| Supplementary Figure 2: Mean contribution of fruit type to total fruit intake by region.....                                                                                   | 11    |
| Supplementary Figure 3: Mean contribution of vegetable type to total vegetable intake by region.....                                                                           | 12    |
| Supplementary Methods: Prospective follow-up for cardiovascular events and mortality.....                                                                                      | 13    |
| Supplementary Methods: Event definitions.....                                                                                                                                  | 14-25 |
| Supplementary Table 4: Ranking of cause-specific deaths by region.....                                                                                                         | 26    |
| Supplementary Table 5: Association of total fruit and vegetable intake with cardiovascular disease and mortality<br>.....                                                      | 27-28 |
| Supplementary Table 6: Association of fruit intake with cardiovascular disease and mortality .....                                                                             | 29-30 |
| Supplementary Table 7: Association of vegetable intake with cardiovascular disease and mortality.....                                                                          | 31-32 |
| Supplementary Table 8: Association of legume intake with cardiovascular disease and mortality.....                                                                             | 33-34 |
| Supplementary Table 9: Association of total fruit, vegetable and legume intake with cardiovascular disease and<br>mortality by region using region-specific tertiles.....      | 35-36 |
| Supplementary Table 10: Association of fruit intake with cardiovascular disease and mortality by region using<br>region-specific tertiles using region-specific tertiles ..... | 37-38 |
| Supplementary Table 11: Association of vegetable intake with cardiovascular disease and mortality by region using<br>region-specific tertiles.....                             | 39-40 |
| Supplementary Table 12: Association of legume intake with cardiovascular disease and mortality by region using<br>region-specific tertiles .....                               | 41-42 |
| Supplementary Table 13: Association of categories of raw vegetable intake with death by region using region-<br>specific tertiles .....                                        | 43-44 |
| Supplementary Table 14: Association of categories of cooked vegetable intake with death by region using region-<br>specific tertiles .....                                     | 45-46 |
| Supplementary Table 15: Association of total fruit, vegetable and legume intake with cardiovascular disease and<br>mortality by region using overall tertiles.....             | 47-48 |
| Supplementary Table 16: Association of fruit intake with cardiovascular disease and mortality by region using<br>region-specific tertiles using overall tertiles .....         | 49-50 |

|                                                                                                                                                                                                 |       |
|-------------------------------------------------------------------------------------------------------------------------------------------------------------------------------------------------|-------|
| Supplementary Table 17: Association of vegetable intake with cardiovascular disease and mortality by region using overall tertiles.....                                                         | 51-52 |
| Supplementary Table 18: Association of legume intake with cardiovascular disease and mortality by region using overall tertiles .....                                                           | 53-54 |
| Supplementary Table 19: Association of raw and cooked vegetable intake with major CVD and death including China.....                                                                            | 55-56 |
| Supplementary Tables 20-26: Association of fruits, vegetables and legumes adjusting for waist-to-hip ratio, hypertension status and cholesterol medication use.....                             | 57-68 |
| Supplementary Table 27: Association of total fruit, vegetable and legume intake with cardiovascular disease and mortality with six or more servings per day as the highest intake category..... | 69    |
| Supplementary Table 28: Association of total fruit and vegetable intake with cardiovascular disease and mortality with six or more servings per day as the highest intake category.....         | 70    |
| Supplementary Figure 4: Cubic spline for the association between total fruit, vegetable and legume intake and total mortality.....                                                              | 71    |
| References.....                                                                                                                                                                                 | 72-73 |
| Funding.....                                                                                                                                                                                    | 74    |
| Acknowledgements.....                                                                                                                                                                           | 75-76 |

## **Supplementary Methods: PURE Study Participant Selection Methodology as Excerpted from Teo et al(1). Selection of Countries**

The choice and number of countries selected in PURE reflects a balance between involving a large number of communities in countries at different economic levels, with substantial heterogeneity in social and economic circumstances and policies, and the feasibility of centers to successfully achieve long-term follow-up. Thus, PURE included sites in which investigators are committed to collecting good-quality data for a low-budget study over the planned 10-year follow-up period and did not aim for a strict proportionate sampling of the entire world.

### **Selection of Communities**

Within each country, urban and rural communities were selected based on broad guidelines. A common definition for “community” that is applicable globally is difficult to establish (2). In PURE, a community was defined as a group of people who have common characteristics and reside in a defined geographic area. A city or large town was not usually considered to be a single community, rather communities from low-, middle-, and high-income areas were selected from sections of the city and the community area defined according to a geographical measure (e.g., a set of contiguous postal code areas or a group of streets or a village). The primary sampling unit for rural areas in many countries was the village. The reason for inclusion of both urban and rural communities is that for many countries, urban and rural environments exhibit distinct characteristics in social and physical environment, and hence, by sampling both, we ensured considerable variation in societal factors across PURE communities. The number of communities selected in each country varied, with the aim to recruit communities with substantial heterogeneity in social and economic circumstances balanced against the capacity of local investigators to maintain follow-up. In some countries (e.g., India, China, Canada, and Colombia), communities from several states/provinces were included to capture regional diversity, in policy, socioeconomic status, culture, and physical environment. In other countries (e.g., Iran, Poland, Sweden, and Zimbabwe), fewer communities were selected.

### **Selections of Households and Individuals**

Within each community, sampling was designed to achieve a broadly representative sample of that community of adults aged between 35 and 70 years. The choice of sampling frame within each center was based on both “representativeness” and feasibility of long-term follow-up, following broad study guidelines. Once a community was identified, where possible, common and standardized approaches were applied to the enumeration of households, identification of individuals, recruitment procedures, and data collection. The method of approaching households differed between regions. For example, in rural areas of India and China, a community announcement was made to the village through contact of a community leader, followed by in-person door-to-door visits of all households. In contrast in Canada, initial contact was by mail followed by telephone inviting members of the households to a central clinic. Households were eligible if at least 1 member of the household was between the 10 ages of 35 and 70 years and the household members intended to continue living in their current home for a further 4 years. For each approach, at least 3 attempts at contact were made. All individuals within these households between 35 and 70 years providing written informed consent were enrolled. When an eligible household or eligible individual in a household refused to participate, demographics and self-reported data about CVD risk factors, education, and history of CVD, cancers and deaths in the households within the two previous years were recorded. To ensure standardization and high data quality, we used a comprehensive operations manual, training workshops, DVDs, regular communication with study personnel and standardized report forms. We entered all data in a customized database programmed with range and consistency checks which was transmitted electronically to the Population Health Research Institute in Hamilton (Ontario, Canada) where further quality checks were implemented.

## **Supplementary Methods: Representativeness of the PURE Cohort as Excerpted from Yusuf et al(3).**

### **a) Are the countries included in the PURE cohort atypical?**

We compared the countries participating in PURE with those participating in MONICA (4), the largest previous study of this nature conducted. We plotted national income (GDP/capita) against research output (number of publications recorded in SCOPUS between 1996 and 2010 per 100,000 population). These data are taken from a previous study undertaken by one of the investigators (M. McKee) on global health research capacity to inform policy discussions within WHO (5). These graphs demonstrate that PURE has captured the full diversity of countries on these two dimensions, in marked contrast to MONICA, which was concentrated in high income countries with substantial research capacity.

### **b) Are PURE populations representative of the countries in which they are situated?**

The PURE household population compared to national statistics had more women (sex ratio 95.1 men per 100 women vs 100.3) and was older (33.1 years vs 27.3), although age had a positive linear relationship between the two data sources (Pearson's  $r = 0.92$ ). PURE was 59.3% urban compared to an average of 63.1% in participating countries. The distribution of education was less than 7% different for each category, although PURE households typically had higher levels of education. For example, 37.8% of PURE household members had completed secondary education compared to 31.3% in the national data. However, age-adjusted annual mortality rates showed positive correlation for men ( $r = 0.91$ ) and women ( $r = 0.92$ ) but were lower in PURE compared to national statistics (7.9 per 1000 vs 8.7 for men; 6.7 vs 8.1 for women). These findings indicate that modest differences exist between the PURE household population and national data for the indicators studied. These differences, however, are unlikely to have much influence on exposure-disease (or health systems assessments vs outcome) associations derived in PURE. In addition, mortality rates reported for the two years prior to enrolment in the PURE study were closely correlated with the mortality rates observed in the study participants during follow up ( $r=0.87$  and  $0.85$  respectively). Further, incidence estimates from PURE, adjusted or stratified according to sex and/or urban/rural location, will enable valid comparisons of the relative rates of various cardiovascular outcomes across countries.

## **Supplementary Methods: Collection of Demographics, Risk Factors and Outcome Events**

We collected data at national, community, household, and individual levels with standardized questionnaires. 1 Questions about age, sex, education, smoking status, hypertension, diabetes, and obesity were identical to those in the INTERHEART and INTERSTROKE studies (6,7). We obtained BP measurements in individuals and so hypertension was defined as those with a BP  $>140/>90$  or those who were already on treatment. Fasting glucose was available in most individuals (76%) and so diabetes was defined as those who were reported as having diabetes and those with a fasting glucose  $>7.0$  mmol/L. (Sensitivity analyses indicate a very high correlation between self report of diabetes alone versus self-report and fasting glucose  $>7.0$  in the 110,000 people with both measures, and so self-report is a reasonable surrogate for the prevalence of diabetes) Total cholesterol was available in 122,640 individuals and a value of  $>5.2$  mmol/L was considered to be elevated. In most of the LIC and MIC there was no central system of death or event registration. We therefore; 1) obtained information on prior medical illness and medically certified cause of death where available, 2) captured best available information from reliable sources in those instances where medical information was not available in order to be able to arrive at a probable diagnosis or cause of death. Event documentation was based on information from household interviews and medical records, death certificates and other sources. We also used Verbal Autopsies to ascertain cause of death in addition to medical records which were reviewed by a health professional. This approach has been used in several studies conducted in LIC and MIC (8,9) To ensure a standard approach and accuracy for classification of events across all countries and over time, the first 100 CVD events (deaths, MI, strokes, heart failure or cancers) for China and India, and 50 cases for other countries were adjudicated both locally and also by the adjudication chair, and if necessary further training was provided. Thereafter, every year, 50 cases for China and India and 25 cases for each of the remaining countries were adjudicated as above.

Table S1. PURE baseline response rates (%) by country and urban/rural location.

| <b>PURE Baseline Response Rates</b> |                                |              |              |
|-------------------------------------|--------------------------------|--------------|--------------|
| <b>Region</b>                       | <b>Country</b>                 | <b>Urban</b> | <b>Rural</b> |
| High-income countries               | Canada                         | 68           | 72           |
|                                     | Sweden                         | 48           | 54           |
|                                     | UAE                            | 63           | 83           |
| Middle-income countries             | Argentina                      | 64           | 86           |
|                                     | Brazil                         | 60           | 77           |
|                                     | Chile                          | 79           | 89           |
|                                     | China                          | 78           | 80           |
|                                     | Colombia                       | 70           | 71           |
|                                     | Iran                           | 76           | 90           |
|                                     | Malaysia                       | 72           | 84           |
|                                     | Poland                         | 74           | 70           |
|                                     | South Africa                   | 69           | 50           |
|                                     | Turkey                         | 78           | 84           |
|                                     | Occupied Palestinian territory | 82           | 85           |
|                                     | Low-income countries           | Bangladesh   | 69           |
| India                               |                                | 57           | 60           |
| Pakistan                            |                                | 80           | 81           |
| Zimbabwe                            |                                | 75           | 87           |

Table S2. Median duration of follow-up in years by country

| <b>Country</b>                       | <b>Median</b> |
|--------------------------------------|---------------|
| UAE                                  | 5·83          |
| Canada                               | 6·81          |
| Sweden                               | 8·92          |
| Poland                               | 7·22          |
| Argentina                            | 7·82          |
| Chile                                | 8·60          |
| Malaysia                             | 6·34          |
| Turkey                               | 6·17          |
| Iran                                 | 6·94          |
| Occupied<br>Palestinian<br>territory | 3·20          |
| Brazil                               | 3·74          |
| South Africa                         | 6·71          |
| Colombia                             | 5·72          |
| China                                | 8·10          |
| India                                | 9·91          |
| Pakistan                             | 5·20          |
| Bangladesh                           | 7·38          |
| Zimbabwe                             | 9·02          |
| Total                                | 7·36          |

Supplementary Figure 1: Flowchart of participants in the PURE Study.

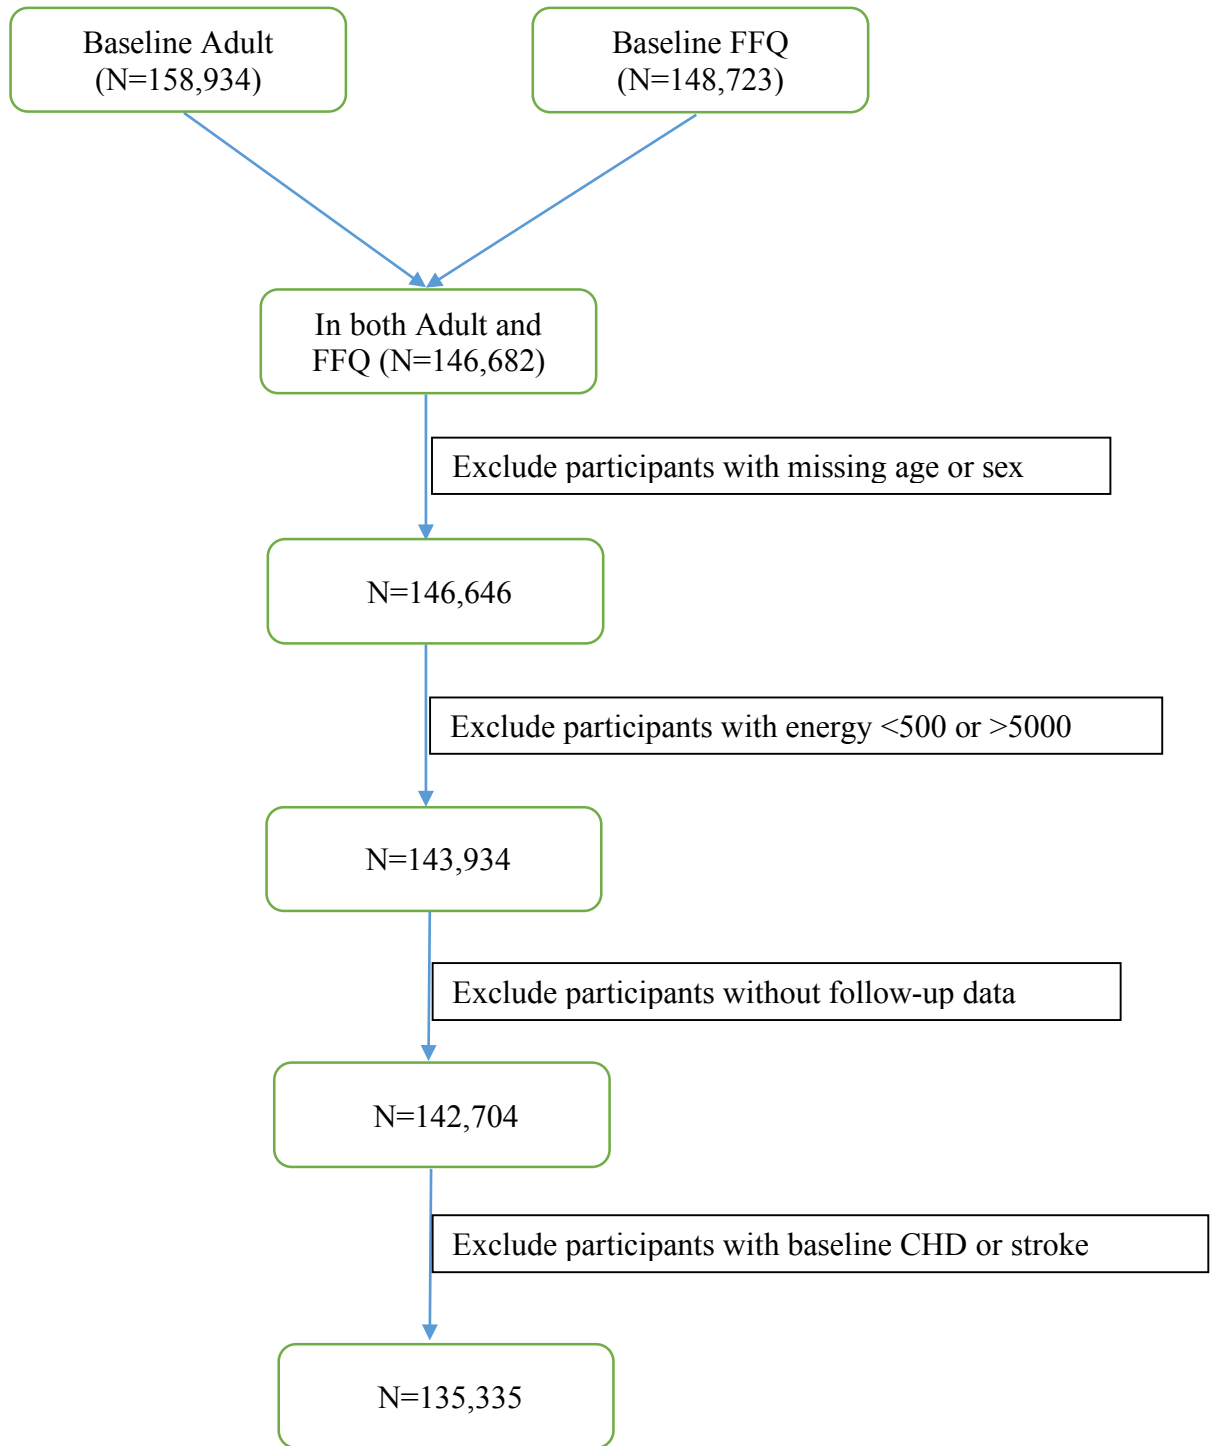



Table S3: Classification of PURE countries into geographic regions

| <b>Region</b>                          | <b>Country</b>                 | <b>N</b> |
|----------------------------------------|--------------------------------|----------|
| North America and Europe<br>(N=14,916) | Canada                         | 9,114    |
|                                        | Poland                         | 1,869    |
|                                        | Sweden                         | 3,933    |
| South America<br>(N=22,626)            | Argentina                      | 7,039    |
|                                        | Brazil                         | 5,615    |
|                                        | Chile                          | 3,400    |
|                                        | Colombia                       | 6,572    |
| Middle East<br>(N=11,485)              | Iran                           | 5,166    |
|                                        | Occupied Palestinian territory | 1,400    |
|                                        | Turkey                         | 3,636    |
|                                        | United Arab Emirates           | 1,283    |
| South Asia<br>(N=29,560)               | Bangladesh                     | 2,759    |
|                                        | India                          | 25,324   |
|                                        | Pakistan                       | 1,477    |
| China<br>(N=42,152)                    | China                          | 42,152   |
| South East Asia<br>(N=10,038)          | Malaysia                       | 10,038   |
| Africa<br>(N=4,558)                    | South Africa                   | 3,466    |
|                                        | Zimbabwe                       | 1,092    |

**Supplementary Methods: Methodology Used for Estimating Dietary Intake**

Participants' habitual food intake was recorded using country-specific (region specific in India) validated food frequency questionnaires (FFQs) at the baseline. For countries where a validated FFQ was not available, we developed and validated FFQs using a standard method (Table S1 in the Supplementary Appendix) (10-21). To convert food into nutrients, country specific nutrient databases were constructed with information on 43 macro and micro-nutrients. The nutrient database is primarily based on the United State Department of Agriculture (USDA) food composition database (release 18 and 21), modified with reference to local food composition tables, and supplemented with recipes of local mixed dishes (22). However, for Canada, China, India, Malaysia, South Africa, Sweden, and Turkey we used the nutrient databases that were used for FFQs validation. The FFQ was administered to the same subgroup of participants and Pearson correlation coefficients, using energy-adjusted and de-attenuated correlations, and weighted kappa were used to validate the FFQs measures against 24-hour dietary recalls. Our validation studies demonstrated reasonable agreement between the FFQs and 24-hour dietary recalls for fruits ( $r_s=0.23-0.66$ ) and vegetables ( $r_s=0.30-0.81$ ) which is in keeping with previous FFQ validation studies (23-27). The concordance rates of classification into the same quartiles ranged from 70% to 74% for fruit and 62% to 79% for vegetables, which is consistent with previous studies which reported cross classification (23-27).

### Supplementary Methods: Food Composition Database Compilation as Excerpted from Merchant & Dehghan (28).

We used the USDA nutrient database as the primary nutrient data source for the PURE study because it is regularly updated, comprehensive and, the data are freely available. To ensure that the nutrient content of the foods were appropriate for the local countries, we referred to other sources such as the INFOODS food composition tables, or local food composition tables. As there are many entries for a single food (18 types of rice for instance) we developed the following algorithm to select the food from the USDA nutrient database that most closely matched the local food. To match the foods we considered total energy content and the following nutrients (macronutrients and minerals) for fruits and vegetables: energy, carbohydrates, calcium, phosphorous, sodium and potassium; dairy: energy, protein, fat, calcium, phosphorous; cereals: energy, carbohydrates, calcium, and phosphorous; and meats and eggs: energy, protein, fat, and iron, because these nutrients were likely to be present in those food groups. We only used macronutrients and minerals for matching because the assays for these nutrients have high within laboratory agreements (29). We did not include vitamins in the matching process because their estimation is sensitive to the assay, method of food preparation, and storage (30-33).

To select the food most similar to the local food we started with the estimated nutrient intake from the local food composition table. We first compared total energy intake for 100 g of that food estimated from the local food composition table. The food with the most similar total energy intake per 100 g of that food on the USDA nutrient database was given a matching score of 1. We repeated this process with the next nutrient and so on, until all the entries for that particular food group were exhausted. The food in the USDA nutrient database with the highest total watching score was considered as being the closest to the local food. In case of a tie we considered the closest match with potassium for fruits and vegetables, total fat for dairy and meats, protein for eggs, and carbohydrates for cereals. The algorithm to select fruits is described in the figure below.

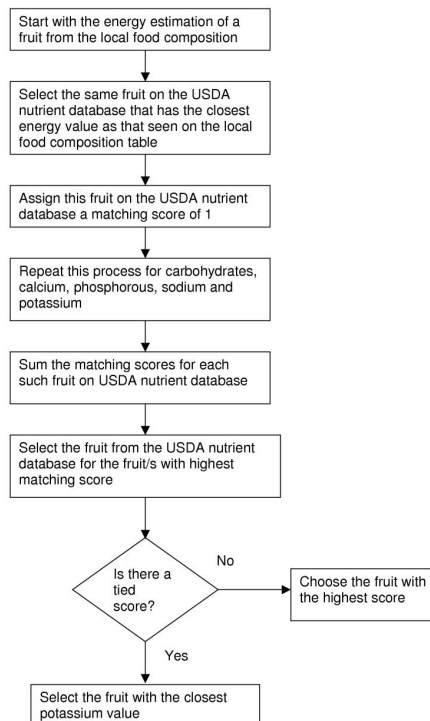

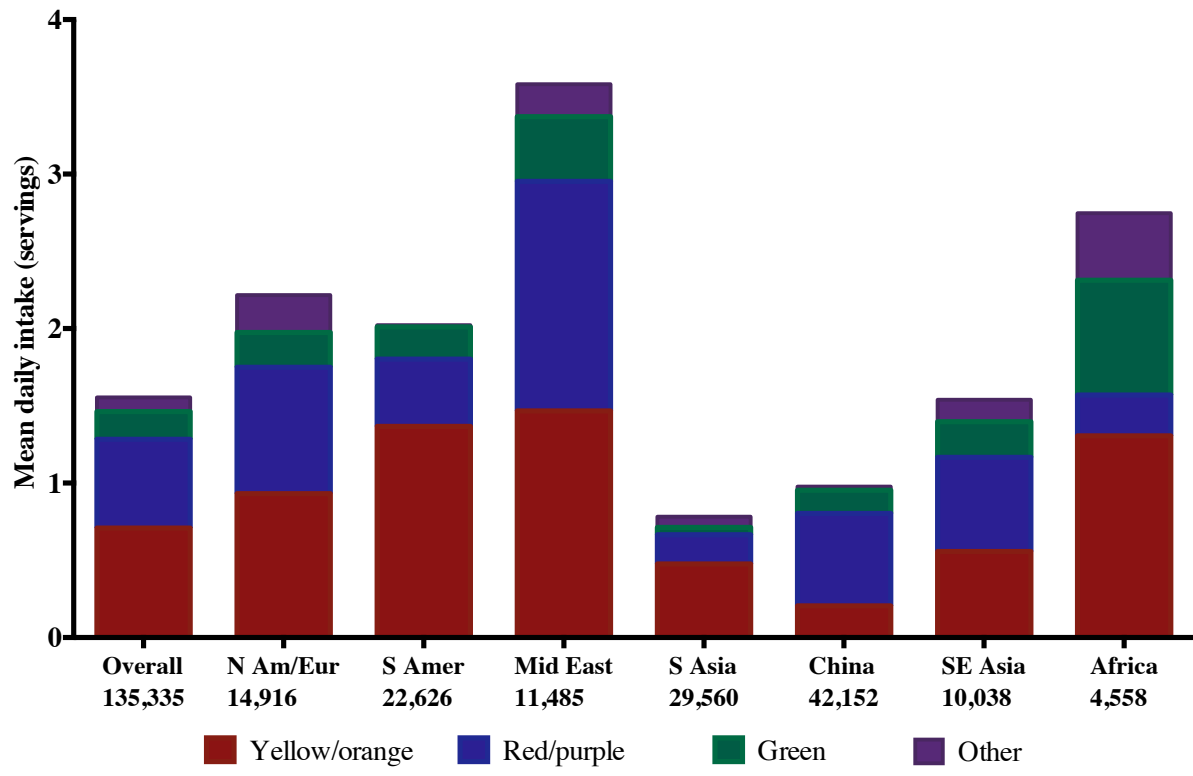

Figure S2: Mean contribution of fruit type to total fruit intake by region

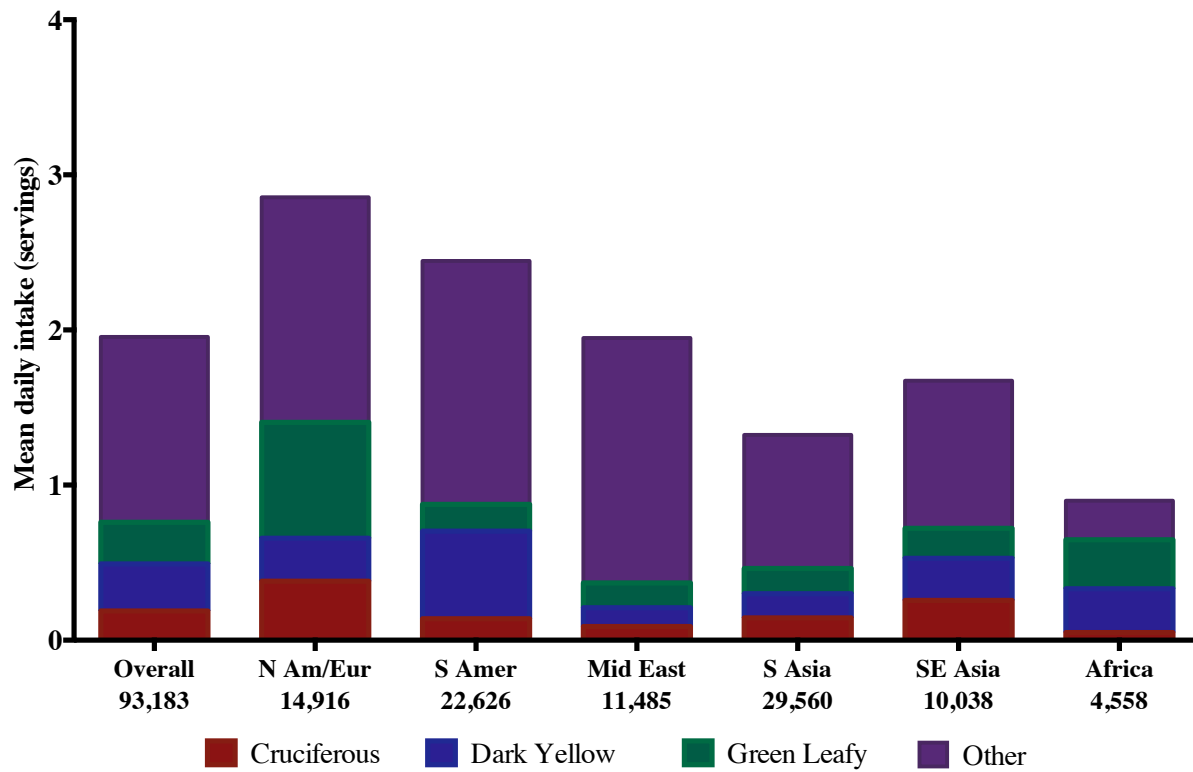

Figure S3: Mean contribution of vegetable type to total vegetable intake by region, not including China (N=42,152)

### **Supplementary Methods: Prospective Follow-up for Cardiovascular Events and Mortality**

History of disease was collected at baseline from every participant with standardized questionnaires. Follow-up was initiated in all sites by 2008 and completed by March, 2017. Up to three attempts were made to interview all households to document events.

Information on specific events (death, myocardial infarction, stroke, heart failure, cancer, hospitalizations, new diabetes, injury, tuberculosis, human immunodeficiency viral infections, malaria, pneumonia, asthma, chronic obstructive pulmonary disease) were obtained from participants or their family members. This information was adjudicated centrally in each country by trained physicians using standardized definitions. Because the PURE study involves urban and rural areas from middle- and low-income countries, supporting documents to confirm cause of death and/or event varied in degrees of completion and availability. In most of middle- and low-income countries there was no central system of death or event registration. Therefore, information was obtained about prior medical illness and medically certified cause of death where available, and, second, best available information was captured from reliable sources in those instances where medical information was not available in order to be able to arrive at a probable diagnosis or cause of death. Event documentation was based on information from death certificates (available in 100% of deaths), medical records (MI: 49·4%, stroke 80·8% and heart failure: 76·2%), household interviews and other sources. Verbal Autopsies were also used to ascertain cause of death in addition to medical records which were reviewed by a health professional. This approach has been used in several studies conducted in middle- and low-income countries.

To ensure a standard approach and accuracy for classification of events across all countries and over time, the first 100 CVD events (deaths, MI, strokes, heart failure or cancers) for China and India, and 50 cases for other countries were adjudicated both locally and also by the adjudication chair, and if necessary further training was provided. Thereafter, every year, 50 cases for China and India and 25 cases for each of the remaining countries were adjudicated as above.

**Supplementary Methods: Event Definitions**

**FATAL EVENTS**

**Cardiovascular Death – Definitions**

**01.00 DEATH DUE TO CARDIOVASCULAR EVENTS**

**01.10 Sudden unexpected Cardiovascular Death (SCVD)**

Without evidence of other cause of death, death that occurred suddenly and unexpectedly (examples: witnessed collapse, persons resuscitated from cardiac arrest who later died) or persons seen alive less than 12 hours prior to discovery of death (example persons found dead in his/her bed).

- SCVD is either definite, probable or possible according to the following characteristics:

| PURE Adjudication Code                                                                                                                                                                                                               | Event Type                                                                                                                                                                                                                                                                                                                                                                                                                              | Acceptable ICD-10 codes |
|--------------------------------------------------------------------------------------------------------------------------------------------------------------------------------------------------------------------------------------|-----------------------------------------------------------------------------------------------------------------------------------------------------------------------------------------------------------------------------------------------------------------------------------------------------------------------------------------------------------------------------------------------------------------------------------------|-------------------------|
| <b>01.11: <u>Definite</u></b>                                                                                                                                                                                                        | One of the following in persons with: <ul style="list-style-type: none"> <li>• known cardiovascular disease, or</li> <li>• diabetes with an additional risk factor such as hypertension, smoking, dyslipidemia, micro albuminuria, serum creatinine 50% above upper limit of normal, or</li> <li>• 3 of the above risk factors, or</li> <li>• 2 of the above risk factors in men aged 60 and more and women aged 65 and more</li> </ul> | No ICD-10 Code          |
| <b>01.12: <u>Probable</u></b>                                                                                                                                                                                                        | One of the following in persons with: <ul style="list-style-type: none"> <li>• diabetes, or</li> <li>• 2 of the above risk factors in men aged less than 60 and in women less than 65, or</li> <li>• one of the above risk factor in men aged 60 and more and in women aged 65 and more, or</li> <li>• typical of chest pain or sudden severe dyspnea of less than 20-minute duration preceding the event</li> </ul>                    |                         |
| <b>01.13: <u>Possible</u></b>                                                                                                                                                                                                        | In persons without risk factor                                                                                                                                                                                                                                                                                                                                                                                                          |                         |
| <p><i>For SCVD, the patient was well or had a stable CVD (example stable angina) when last seen alive. The event of a sudden death occurring during the hospitalization of MI is considered a fatal MI and not sudden death.</i></p> |                                                                                                                                                                                                                                                                                                                                                                                                                                         |                         |

**01.30 Fatal Myocardial Infarction**

**Symptoms of Myocardial Infarction:**

Typical symptoms or suggestive symptoms of MI according to physician are characterized by severe anterior chest pain as tightness, crushing, burning, lasting at least 20 minutes, occurring at rest, or on exertion, that may radiate to the arms or neck or jaw and may be associated with dyspnea, diaphoresis and nausea. However, death associated with nausea and vomiting with or without chest pain not due to another cause may be considered as possible MI if ECG and cardiac markers are not done. These symptoms may have occurred the last month before death.

Fatal myocardial infarction is either definite, probable or possible according to the following characteristics:

| PURE Adjudication Code        | Event Type                                                                                                                                                                                                                                                                                                                                                                                                                                                                                                                                                                                                                                                             | Acceptable ICD-10 codes |
|-------------------------------|------------------------------------------------------------------------------------------------------------------------------------------------------------------------------------------------------------------------------------------------------------------------------------------------------------------------------------------------------------------------------------------------------------------------------------------------------------------------------------------------------------------------------------------------------------------------------------------------------------------------------------------------------------------------|-------------------------|
| <b>01.31: <u>Definite</u></b> | <ol style="list-style-type: none"> <li>1. Autopsy demonstrating fresh myocardial infarction and/or recent coronary occlusion, <b>or</b></li> <li>2. ECG showing new and definite sign of MI (Minnesota code 1-1-1) <b>or</b></li> <li>3. Symptoms typical or atypical or inadequately described but attributed to cardiac origin lasting at least 20 minutes and by troponin or cardiac enzymes (CKMB, CK, SGOT, SLDH) above center laboratory ULN</li> <li>4. ECG with new ischemic changes (new ST elevation/depression or T wave inversion <math>\geq 2</math> mm) and by troponin or cardiac enzymes (CKMB, CK, SGOT, SLDH) above center laboratory ULN</li> </ol> | I21- I22                |
| <b>01.32: <u>Probable</u></b> | <ol style="list-style-type: none"> <li>1. ECG with sign of probable MI (Minnesota code 1-2-1), <b>or</b></li> <li>2. Typical symptoms lasting at least 20 minutes considered of cardiac origin, with only new ST-T changes (new ST elevation/depression or T wave inversion <math>\geq 1</math> but <math>&lt; 2</math>mm) without documented increased cardiac markers or enzyme as in PURE definition 1.31 (above), <b>or</b></li> <li>3. Increased cardiac enzymes as in PURE definition 1.31 (above) showing a typical pattern of MI as above without symptoms or significant ECG changes</li> </ol>                                                               |                         |
| <b>01.33: <u>Possible</u></b> | <ol style="list-style-type: none"> <li>1. ECG with sign of possible MI (Minnesota code 1-3-1) <b>or</b></li> <li>2. Typical symptoms or symptoms suggestive of MI according to the physician lasting at least 20 minutes without documented ECG or cardiac marker.</li> </ol>                                                                                                                                                                                                                                                                                                                                                                                          |                         |

The **Minnesota codes** for MI is taken from Rose and Blackburn and published in their book “Evaluation Methods of Cardiovascular Disease WHO 1969”.

- **Definite MI** is Q/R ratio  $\geq 1/3$  and Q duration  $\geq 0.03$  second in one of the following leads: I, II, V2, 3, 4, 5, 6. (code 1-1-1)
- **Probable MI** is Q/R ratio  $\geq 1/3$  and Q duration between 0.02 and 0.03 second in one of the following leads: I, II, V2, 3, 4, 5, 6. (code 1-2-1)
- **Possible MI** is Q/R ratio between 1/5 and 1/3 and Q duration between 0.02 and 0.03 second in one of the following leads: I, II, V2, 3, 4, 5, 6. (code 1-3-1)



#### 01.40 Fatal Stroke

Fatal stroke is either definite or possible according to the following characteristics:

| PURE Adjudication Code        | Event Type                                                                                                                                                                                                                                                                                                                                                                                                                                                                                                                                                                                                                                                                                                                                                                                                                                                                                                                                                                                                                                                                                                                                                                                                                                                                                                                                                   | Acceptable ICD-10 codes |
|-------------------------------|--------------------------------------------------------------------------------------------------------------------------------------------------------------------------------------------------------------------------------------------------------------------------------------------------------------------------------------------------------------------------------------------------------------------------------------------------------------------------------------------------------------------------------------------------------------------------------------------------------------------------------------------------------------------------------------------------------------------------------------------------------------------------------------------------------------------------------------------------------------------------------------------------------------------------------------------------------------------------------------------------------------------------------------------------------------------------------------------------------------------------------------------------------------------------------------------------------------------------------------------------------------------------------------------------------------------------------------------------------------|-------------------------|
| <b>01.41: <u>Definite</u></b> | <p>Stroke death is defined as death within 30 days from an acute focal neurological deficit <i>diagnosed by a physician</i> and thought to be of vascular origin (without other cause such as brain tumor) with signs and symptoms lasting <math>\geq</math> 24 hrs.</p> <p>Stroke death is also considered if death occurred within 24 hrs. of onset of persisting signs and symptoms, or if there is evidence of a recent stroke on autopsy.</p> <p>N.B.</p> <ul style="list-style-type: none"><li>• <b>In a subject with a stroke <math>\leq</math> 30 days:</b> If death occurred with a pneumonia due to possible aspiration, death will be considered to be due to stroke.</li><li>• <b>In a subject with a stroke <math>&gt;</math> 30 days:</b> If death occurred with a pneumonia due to possible aspiration, the adjudicator will make a decision according to his/her clinical judgment if death is related to stroke or not.</li><li>• Subarachnoid hemorrhage death manifested by sudden onset headache with/without focal signs and imaging (CT or MRI) evidence of bleeding primarily in the subarachnoid space is considered a fatal stroke in absence of trauma or brain tumor or malformation</li><li>• Subdural hematoma death is <u>not</u> considered as a stroke death and may be related to previous trauma or other cause.</li></ul> | I60- I64, I69           |
| <b>01.43: <u>Possible</u></b> | Death in a participant with a history of sudden onset of focal neurological deficit of one or more limbs, loss of vision or slurred speech lasting about 24 hours.                                                                                                                                                                                                                                                                                                                                                                                                                                                                                                                                                                                                                                                                                                                                                                                                                                                                                                                                                                                                                                                                                                                                                                                           |                         |

### 01.50 Fatal Congestive Heart Failure

Fatal congestive heart failure is either definite or possible according to the following characteristics:

| PURE Adjudication Code        | Event Type                                                                                                                                                                                                                                                                                                                                                                                                                                                                                                                                                                                                              | Acceptable ICD-10 codes |
|-------------------------------|-------------------------------------------------------------------------------------------------------------------------------------------------------------------------------------------------------------------------------------------------------------------------------------------------------------------------------------------------------------------------------------------------------------------------------------------------------------------------------------------------------------------------------------------------------------------------------------------------------------------------|-------------------------|
| <b>01.51: <u>Definite</u></b> | The diagnosis of congestive heart failure may be an autopsy finding in absence of other cause or requires signs (rales, increased jugular venous pressure or ankle edema) or symptoms (nocturnal paroxysmal dyspnea, dyspnea at rest or ankle edema) of congestive heart failure <b>and</b> one or both of the following: <ul style="list-style-type: none"><li>• radiological signs of pulmonary congestion,</li><li>• treatment of heart failure with diuretics</li></ul> <i>If sudden death occurred in a patient with chronic severe heart failure, it should be adjudicated as fatal congestive heart failure.</i> | 150                     |
| <b>01.52: <u>Probable</u></b> | Progressive shortness of breath on lying down or at night, improving on sitting up AND any of the following signs or symptoms: swelling of feet, distension of abdomen, progressive cough in a person with known hypertension or a history of previous MI/angina or other heart disease                                                                                                                                                                                                                                                                                                                                 |                         |
| <b>01.53: <u>Possible</u></b> | Progressive shortness of breath on lying down or at night, improving on sitting up AND any of the following signs or symptoms: swelling of feet, distension of abdomen, progressive cough                                                                                                                                                                                                                                                                                                                                                                                                                               |                         |

**01.60 Death Due to Other Cardiovascular Deaths** (other causes [1.10 to 1.50 above] having been excluded)

| PURE Adjudication Code | Event Type                                                                                                                                                                                                                                                                                       | Acceptable ICD-10 codes                                                                                  |
|------------------------|--------------------------------------------------------------------------------------------------------------------------------------------------------------------------------------------------------------------------------------------------------------------------------------------------|----------------------------------------------------------------------------------------------------------|
| 01.61                  | Arterial rupture of aneurysm                                                                                                                                                                                                                                                                     | I71- I72                                                                                                 |
| 01.62                  | Pulmonary embolism<br><i>NOTE: Death associated with pulmonary embolism occurring <b>within 2 weeks</b> after a fracture such as hip, femur should attributed to death due to injury. Refer to Injury, Section 6.0</i>                                                                           | I26                                                                                                      |
| 01.63                  | Arrhythmic death (A-V block, sustained ventricular tachycardia in absence of other causes)                                                                                                                                                                                                       | I44- I45, I47- I49                                                                                       |
| 01.64                  | Death after invasive cardiovascular intervention: a perioperative death extending to 30 days after coronary or arterial surgical revascularization and to 7 days after a coronary or arterial percutaneous dilatation (angioplasty) with or without a stent or an invasive diagnostic procedure. | I97                                                                                                      |
| 01.65                  | Congenital heart disease                                                                                                                                                                                                                                                                         | Q20-Q28                                                                                                  |
| 01.66                  | Heart valve disease (including rheumatic heart disease)                                                                                                                                                                                                                                          | I01, I05- I09, I34- I37                                                                                  |
| 01.67                  | Endocarditis                                                                                                                                                                                                                                                                                     | I33, I38                                                                                                 |
| 01.68                  | Myocarditis                                                                                                                                                                                                                                                                                      | I40                                                                                                      |
| 01.69                  | Tamponade (pericarditis)                                                                                                                                                                                                                                                                         | I30, I31, I32                                                                                            |
| 01.70                  | Other cardiovascular events (Excluding 1.61 to 1.69 above)<br><i>Valid ICD-10 codes would include the following:<br/>I11, I12, I13, I23, I24, I25, I27, I28, I42, I51, I52, I65-I68, I73, I74, I96, I98, I99</i><br>(Refer to ICD-10 Listing for associated definitions for each code)           | Any valid 'I' (Cardiovascular) ICD-10 code that can be classified as underlying CoD, not specified above |

**NON-FATAL EVENTS**

**Cardiovascular Events – Definitions**

**10.00 NON-FATAL CARDIOVASCULAR EVENTS**

**10.10 Non-Periprocedural Myocardial Infarction (MI)**

MI is considered either definite, probable or possible according to the following characteristics:

| <b>PURE Adjudication Code</b> | <b>Event Type</b>                                                                                                                                                                                                                                                                                                                                                                                                                                                                                                                                                                                                                                                                               | <b>Acceptable ICD-10 codes</b> |
|-------------------------------|-------------------------------------------------------------------------------------------------------------------------------------------------------------------------------------------------------------------------------------------------------------------------------------------------------------------------------------------------------------------------------------------------------------------------------------------------------------------------------------------------------------------------------------------------------------------------------------------------------------------------------------------------------------------------------------------------|--------------------------------|
| <b>10.11: <u>Definite</u></b> | 5. ECG showing new and definite sign of MI (Minnesota code 1-1-1) <b>or</b><br>6. Symptoms typical or atypical or inadequately described but attributed to cardiac origin lasting at least 20 minutes and by troponin or cardiac enzymes (CKMB, CK, SGOT, SLDH) above center laboratory ULN<br>7. ECG with new ischemic changes (new ST elevation/depression or T wave inversion $\geq 2$ mm) and by troponin or cardiac enzymes (CKMB, CK, SGOT, SLDH) above center laboratory ULN<br><br>Please note that increased markers may occur in trauma (CK, AST, myoglobin and CK MB to a lesser degree); renal insufficiency, heart failure, pulmonary embolism.... (troponin), cardioversion (all) | I21-I22                        |
| <b>10.12: <u>Probable</u></b> | 4. ECG with new and probable sign of MI (Minnesota code 1-2-1), <b>or</b><br>5. Typical symptoms lasting at least 20 minutes considered of cardiac origin, with only new ST-T changes (new ST elevation/depression or T wave inversion $\geq 1$ but $< 2$ mm) without documented increased cardiac markers as in PURE definition 10.11 (above), <b>or</b><br>6. Increased cardiac enzymes showing a typical pattern of MI as above without symptoms or significant ECG changes.                                                                                                                                                                                                                 |                                |
| <b>10.13: <u>Possible</u></b> | 1. ECG with new and possible sign of MI (Minnesota code 1-3-1), <b>or</b><br>2. Typical symptoms lasting 20 minutes and more considered to be of cardiac origin without documented ECG or cardiac marker.                                                                                                                                                                                                                                                                                                                                                                                                                                                                                       |                                |

## 10.20 Periprocedural Myocardial Infarction

| PURE Adjudication Code        | Event Type                                                                                                                                                                                                                                                                                                                                                                                                                                                                                                                                                                                                                                                                                                                             | Acceptable ICD-10 codes |
|-------------------------------|----------------------------------------------------------------------------------------------------------------------------------------------------------------------------------------------------------------------------------------------------------------------------------------------------------------------------------------------------------------------------------------------------------------------------------------------------------------------------------------------------------------------------------------------------------------------------------------------------------------------------------------------------------------------------------------------------------------------------------------|-------------------------|
| <b>10.21: <u>Definite</u></b> | <ol style="list-style-type: none"> <li>1. ECG showing new and definite sign of MI (Minnesota code 1-1-1), or</li> <li>2. Increased cardiac markers within 48 hours of procedure: <ul style="list-style-type: none"> <li>• percutaneous coronary intervention: CKMB should be <math>\geq 5</math> X ULN or troponin <math>\geq 5</math> X above lower level of necrosis <b>OR</b> <math>&gt; 20\%</math> increase in cardiac markers if elevated at the beginning of the procedure in a patient with symptoms suggestive of myocardial ischemia</li> <li>• Coronary surgery: Increased cardiac markers CKMB should be <math>\geq 10</math>X ULN or troponin <math>\geq 10</math>X above lower limit of necrosis.</li> </ul> </li> </ol> | I21-I22                 |

The **Minnesota codes** for MI is taken from Rose and Blackburn and published in their book “Evaluation Methods of Cardiovascular Disease WHO 1969”.

- **Definite MI** is Q/R ratio  $\geq 1/3$  and Q duration  $\geq 0.03$  second in one of the following leads: I, II, V2, 3, 4, 5, 6. (code 1-1-1)
- **Probable MI** is Q/R ratio  $\geq 1/3$  and Q duration between 0.02 and 0.03 second in one of the following leads: I, II, V2, 3, 4, 5, 6. (code 1-2-1)
- **Possible MI** is Q/R ratio between  $1/5$  and  $1/3$  and Q duration between 0.02 and 0.03 second in one of the following leads: I, II, V2, 3, 4, 5, 6. (code 1-3-1)

### 10.30 Stroke/Transient Ischemic Attack (TIA)

| PURE Adjudication Code        | Event Type                                                                                                                                                                                                                                                                                                                                                                                                                                                                                                                                                                                                                                                                                                   | Acceptable ICD-10 codes |
|-------------------------------|--------------------------------------------------------------------------------------------------------------------------------------------------------------------------------------------------------------------------------------------------------------------------------------------------------------------------------------------------------------------------------------------------------------------------------------------------------------------------------------------------------------------------------------------------------------------------------------------------------------------------------------------------------------------------------------------------------------|-------------------------|
| <b>10.31: <u>Definite</u></b> | <p>Stroke is defined as an acute focal neurological deficit <i>diagnosed by a physician</i> and thought to be of vascular origin (without other cause such as brain tumor) with signs and symptoms lasting <math>\geq</math> 24 hrs.</p> <p>N.B.</p> <ul style="list-style-type: none"> <li>• Subarachnoid hemorrhage manifested by sudden onset headache with/without focal signs and imaging (CT or MRI or lumbar puncture) showing evidence of bleeding primarily in the subarachnoid space is considered a stroke in absence of trauma or brain tumor or malformation</li> <li>• Subdural hematoma is <u>not</u> considered as a stroke and may be related to previous trauma or other cause.</li> </ul> | I60-I64, I69            |
| <b>10.33: <u>Possible</u></b> | Stroke is possible if there is a history of sudden onset of focal neurological deficit of one or more limbs, loss of vision or slurred speech lasting about 24 hours or more                                                                                                                                                                                                                                                                                                                                                                                                                                                                                                                                 |                         |
| <b>10.34: <u>TIA</u></b>      | The diagnosis of TIA requires the presence of acute focal neurological deficit thought to be of vascular origin with signs and symptoms lasting less than 24 hours                                                                                                                                                                                                                                                                                                                                                                                                                                                                                                                                           | G45                     |

#### 10.40 Congestive Heart Failure

| PURE Adjudication Code        | Event Type                                                                                                                                                                                                                                                                                                                                                                                                                      | Acceptable ICD-10 codes |
|-------------------------------|---------------------------------------------------------------------------------------------------------------------------------------------------------------------------------------------------------------------------------------------------------------------------------------------------------------------------------------------------------------------------------------------------------------------------------|-------------------------|
| <b>10.41: <u>Definite</u></b> | <p>The diagnosis of congestive heart failure requires signs (rales, increased jugular venous pressure or ankle edema) or symptoms (nocturnal paroxysmal dyspnea, dyspnea at rest or ankle edema) of congestive heart failure <b>and</b> one or both of the following:</p> <ul style="list-style-type: none"> <li>• radiological signs of pulmonary congestion,</li> <li>• Treatment of heart failure with diuretics.</li> </ul> | 150                     |
| <b>10.42: <u>Probable</u></b> | <p>Progressive shortness of breath on lying down or at night, improving on sitting up AND any of the following signs or symptoms: swelling of feet, distension of abdomen, progressive cough in a person with known hypertension or a history of previous MI/angina or other heart disease</p>                                                                                                                                  |                         |
| <b>10.43: <u>Possible</u></b> | <p>Congestive heart failure is considered possible when there is progressive shortness of breath on lying down or at night, improving on sitting up AND any of the following signs or symptoms: swelling of feet, distension of abdomen, progressive cough</p>                                                                                                                                                                  |                         |

**10.50 Effort Angina with documented Ischemia**

| <b>PURE<br/>Adjudication Code</b> | <b>Event Type</b>                                                                                                                                      | <b>Acceptable<br/>ICD-10 codes</b> |
|-----------------------------------|--------------------------------------------------------------------------------------------------------------------------------------------------------|------------------------------------|
| <b>10.51: Definite</b>            | Stress test with ECG with new ST depression >1 mm or positive imaging (ECHO, Scan) compatible with ischemia                                            | I20                                |
| <b>10.52: Probable</b>            | Typical effort angina (i.e. Squeezing, pressure or burning type pain touching the sternum occurring on exertion and relieved by rest or nitroglycerin) |                                    |



**10.60 Unstable Angina**

| <b>PURE<br/>Adjudication Code</b> | <b>Event Type</b>                                                                                                                                                                              | <b>Acceptable<br/>ICD-10 codes</b> |  |
|-----------------------------------|------------------------------------------------------------------------------------------------------------------------------------------------------------------------------------------------|------------------------------------|--|
| <b>10.61: <u>Definite</u></b>     | 1. Hospitalization for typical symptoms with new ECG changes (T wave inversion < 2mm) <b>OR</b><br>2. Coronary revascularization within one week of admission, and treated as unstable angina. | I20                                |  |
| <b>10.62: <u>Probable</u></b>     | 1. Hospitalization for typical symptoms lasting at least 10 but less than 20 minutes without ECG or cardiac enzyme elevation                                                                   |                                    |  |
| <b>10.63: <u>Possible</u></b>     | Not hospitalized for typical symptoms of angina occurring at rest and treated as unstable angina: rest, anti-platelets, nitrates, beta blockers and/or calcium channel blockers.               |                                    |  |

### 10.80 Other Non-Fatal Cardiovascular Events

| PURE Adjudication Code | Event Type                                                                                                                                                                                                | Acceptable ICD-10 codes                                      |
|------------------------|-----------------------------------------------------------------------------------------------------------------------------------------------------------------------------------------------------------|--------------------------------------------------------------|
| 10.81                  | Rheumatic Heart Disease                                                                                                                                                                                   | I01, I05-I09                                                 |
| 10.82                  | Other valvular heart diseases (excluding Rheumatic Heart Disease)                                                                                                                                         | I34-I37                                                      |
| 10.83                  | Pericarditis                                                                                                                                                                                              | I30, I31, I32                                                |
| 10.84                  | Endocarditis                                                                                                                                                                                              | I33, I38                                                     |
| 10.85                  | Myocarditis                                                                                                                                                                                               | I40                                                          |
| 10.86                  | Congenital heart disease                                                                                                                                                                                  | Q20-Q28                                                      |
| 10.87                  | Atrial fibrillation/flutter<br>Atrial Fibrillation and Flutter are due to an abnormal cardiac rhythm at the atrial level, and the diagnosis is made on the electrocardiographic (ECG) tracing or monitor. | I48                                                          |
| 10.88                  | Peripheral artery disease (lower limb iliac to popliteal and carotid)                                                                                                                                     | I73                                                          |
| 10.90                  | Pulmonary embolism                                                                                                                                                                                        | I26                                                          |
| 10.91                  | Other cardiac or arterial diseases:<br><i>Specific details should be provided on the corresponding Adjudication Form</i>                                                                                  | Any 'I' (Cardiovascular)<br>ICD-10 code not classified above |

Table S4: Ranking of cause-specific deaths by region.

| <b>Region</b>        | <b>Cardiovascular disease</b> | <b>Cancer</b> | <b>Respiratory</b> | <b>Injury</b> |
|----------------------|-------------------------------|---------------|--------------------|---------------|
| Overall              | 1                             | 2             | 3                  | 4             |
| South Asia           | 1                             | 2             | 3                  | 4             |
| China                | 2                             | 1             | 4                  | 3             |
| Southeast Asia       | 1                             | 2             | 3                  | 4             |
| Africa               | 1                             | 3             | 2                  | 4             |
| North America/Europe | 2                             | 1             | 3                  | 4             |
| Middle East          | 1                             | 2             | 4                  | 3             |
| South America        | 2                             | 1             | 3                  | 4             |

Table S5: Association of total fruit and vegetable intake with cardiovascular outcomes and mortality

| <b>All participants (N=135,335)</b>         | <b>&lt;1/day (N=16,512)</b> | <b>1 to &lt;2/day (N=20,478)</b> | <b>2 to &lt;3/day (N=36,036)</b> | <b>3 to &lt;4/day (N=22,134)</b> | <b>4 to &lt;5/day (N=12,604)</b> | <b>5 to &lt;6/day (N=8,575)</b> | <b>6 to 7/day (N=5,841)</b> | <b>7 to 8/day (N=4,068)</b> | <b>&gt;8/day (N=9,078)</b> | <b>P-trend</b> |
|---------------------------------------------|-----------------------------|----------------------------------|----------------------------------|----------------------------------|----------------------------------|---------------------------------|-----------------------------|-----------------------------|----------------------------|----------------|
| Median fruit and vegetable intake, servings | 0.61 (0.38-0.81) per day    | 1.53 (1.27-1.77) per day         | 2.47 (2.25-2.71) per day         | 3.43 (3.20-3.70) per day         | 4.44 (4.20-4.70) per day         | 5.45 (5.22-5.72) per day        | 6.45 (6.22-6.71) per day    | 7.45 (7.22-7.71) per day    | 9.98 (8.82-12.12) per day  |                |
| <b>Major CVD</b>                            |                             |                                  |                                  |                                  |                                  |                                 |                             |                             |                            |                |
| Major CVD events (N=4,784)                  | 712 (4.31)                  | 746 (3.64)                       | 1,414 (3.92)                     | 782 (3.53)                       | 409 (3.25)                       | 234 (2.73)                      | 153 (2.62)                  | 97 (2.38)                   | 237 (2.61)                 |                |
| Age and sex adjusted                        | 1.00                        | 0.93 (0.84-1.04)                 | 1.02 (0.92-1.13)                 | 0.99 (0.88-1.11)                 | 0.98 (0.86-1.12)                 | 0.84 (0.71-0.98)                | 0.81 (0.67-0.98)            | 0.76 (0.60-0.95)            | 0.81 (0.69-0.96)           | 0.0010         |
| Multivariable adjusted                      | 1.00                        | 0.94 (0.83-1.05)                 | 1.04 (0.93-1.17)                 | 1.05 (0.92-1.19)                 | 1.06 (0.91-1.23)                 | 0.89 (0.75-1.06)                | 0.90 (0.73-1.10)            | 0.81 (0.64-1.03)            | 0.88 (0.73-1.07)           | 0.1045         |
| <b>MI</b>                                   |                             |                                  |                                  |                                  |                                  |                                 |                             |                             |                            |                |
| MI events (N=2,143)                         | 361 (2.19)                  | 396 (1.93)                       | 541 (1.50)                       | 329 (1.49)                       | 186 (1.48)                       | 104 (1.21)                      | 64 (1.10)                   | 47 (1.16)                   | 115 (1.27)                 |                |
| Age and sex adjusted                        | 1.00                        | 0.97 (0.84-1.12)                 | 1.10 (0.95-1.28)                 | 1.09 (0.92-1.29)                 | 1.01 (0.83-1.23)                 | 0.83 (0.66-1.06)                | 0.74 (0.56-0.98)            | 0.78 (0.57-1.08)            | 0.89 (0.70-1.13)           | 0.0345         |
| Multivariable adjusted                      | 1.00                        | 0.96 (0.82-1.13)                 | 1.10 (0.94-1.30)                 | 1.13 (0.94-1.36)                 | 1.07 (0.87-1.32)                 | 0.86 (0.67-1.11)                | 0.80 (0.59-1.08)            | 0.87 (0.62-1.22)            | 0.95 (0.72-1.25)           | 0.2400         |
| <b>Stroke</b>                               |                             |                                  |                                  |                                  |                                  |                                 |                             |                             |                            |                |
| Stroke events (N=2,234)                     | 283 (1.71)                  | 274 (1.34)                       | 785 (2.18)                       | 406 (1.83)                       | 176 (1.40)                       | 110 (1.28)                      | 70 (1.20)                   | 39 (0.96)                   | 91 (1.00)                  |                |
| Age and sex adjusted                        | 1.00                        | 0.89 (0.75-1.05)                 | 0.98 (0.83-1.15)                 | 0.97 (0.82-1.16)                 | 0.96 (0.78-1.18)                 | 0.96 (0.76-1.23)                | 0.95 (0.71-1.26)            | 0.82 (0.64-1.10)            | 0.84 (0.64-1.10)           | 0.3790         |
| Multivariable adjusted                      | 1.00                        | 0.87 (0.72-1.05)                 | 0.98 (0.82-1.17)                 | 1.02 (0.84-1.23)                 | 1.01 (0.81-1.27)                 | 1.02 (0.79-1.33)                | 1.04 (0.77-1.41)            | 0.80 (0.54-1.17)            | 0.90 (0.67-1.23)           | 0.9628         |
| <b>CV mortality</b>                         |                             |                                  |                                  |                                  |                                  |                                 |                             |                             |                            |                |
| CV mortality events (N=1,649)               | 409 (2.48)                  | 350 (1.71)                       | 367 (1.02)                       | 195 (0.88)                       | 123 (0.98)                       | 67 (0.78)                       | 49 (0.84)                   | 23 (0.57)                   | 66 (0.73)                  |                |
| Age and sex adjusted                        | 1.00                        | 0.83 (0.72-0.97)                 | 0.84 (0.71-0.98)                 | 0.72 (0.60-0.87)                 | 0.80 (0.64-0.99)                 | 0.66 (0.50-0.87)                | 0.75 (0.55-1.03)            | 0.51 (0.33-0.79)            | 0.65 (0.49-0.87)           | <0.0001        |
| Multivariable adjusted                      | 1.00                        | 0.88 (0.74-1.04)                 | 0.87 (0.73-1.05)                 | 0.80 (0.65-0.99)                 | 0.89 (0.70-1.14)                 | 0.72 (0.53-0.98)                | 0.90 (0.64-1.27)            | 0.60 (0.38-0.95)            | 0.78 (0.55-1.09)           | 0.0574         |
| <b>Non-CV mortality</b>                     |                             |                                  |                                  |                                  |                                  |                                 |                             |                             |                            |                |
| Non-CV mortality events                     | 1,044 (6.32)                | 772 (3.77)                       | 875 (2.43)                       | 384 (1.73)                       | 236 (1.87)                       | 157 (1.83)                      | 100 (1.71)                  | 66 (1.62)                   | 175 (1.93)                 |                |

|                            |              |                  |                  |                  |                  |                  |                  |                  |                  |         |
|----------------------------|--------------|------------------|------------------|------------------|------------------|------------------|------------------|------------------|------------------|---------|
| (N=3,809)                  |              |                  |                  |                  |                  |                  |                  |                  |                  |         |
| Age and sex adjusted       | 1·00         | 0·80 (0·73-0·89) | 0·71 (0·63-0·79) | 0·55 (0·48-0·63) | 0·60 (0·51-0·70) | 0·57 (0·48-0·69) | 0·54 (0·43-0·67) | 0·50 (0·38-0·65) | 0·55 (0·46-0·66) | <0·0001 |
| Multivariable adjusted     | 1·00         | 0·89 (0·80-0·99) | 0·84 (0·74-0·95) | 0·71 (0·61-0·82) | 0·81 (0·68-0·96) | 0·77 (0·63-0·94) | 0·79 (0·62-1·00) | 0·73 (0·55-0·96) | 0·84 (0·67-1·04) | 0·0142  |
| <b>Mortality</b>           |              |                  |                  |                  |                  |                  |                  |                  |                  |         |
| Mortality events (N=5,796) | 1,547 (9·37) | 1,195 (5·84)     | 1,313 (3·64)     | 614 (2·77)       | 380 (3·01)       | 235 (2·74)       | 159 (2·72)       | 96 (2·36)        | 257 (2·83)       |         |
| Age and sex adjusted       | 1·00         | 0·81 (0·75-0·88) | 0·74 (0·68-0·81) | 0·60 (0·54-0·74) | 0·65 (0·58-0·74) | 0·59 (0·51-0·68) | 0·60 (0·50-0·71) | 0·51 (0·41-0·64) | 0·58 (0·50-0·68) | <0·0001 |
| Multivariable adjusted     | 1·00         | 0·88 (0·80-0·96) | 0·84 (0·76-0·93) | 0·73 (0·65-0·82) | 0·82 (0·72-0·94) | 0·73 (0·62-0·86) | 0·81 (0·67-0·97) | 0·69 (0·55-0·86) | 0·81 (0·68-0·96) | 0·0006  |

Major CVD: defined as death from cardiovascular causes and nonfatal myocardial infarction, stroke, and heart failure MI: myocardial infarction; CV mortality: cardiovascular mortality; Non-CV mortality: non-cardiovascular mortality. Crude event rates shown. Age and sex adjusted: adjusted for age, sex, center (random effect), multivariable adjusted: adjusted for age, sex, center (random effect), energy intake, current smoker, diabetes, urban/rural location, physical activity, education level, tertiles of white meat, red meat, bread and cereals and vegetable intake. Additional sensitivity analyses with waist-to-hip ratio, hypertension status and statin medication used in the model did not materially alter estimates of association (Shown in the Supplementary Appendix).

Table S6: Association of fruit intake with cardiovascular outcomes and mortality.

| <b>All participants<br/>(N=135,335)</b> | <b>&lt;3/week<br/>(N=37,849)</b> | <b>3/week to<br/>&lt;1/day<br/>(N=31,929)</b> | <b>1 to &lt;2/day<br/>(N=32,850)</b> | <b>2 to &lt;3/day<br/>(N=14,706)</b> | <b>&gt;3/day<br/>(N=18,001)</b> | <b>P-trend</b> |
|-----------------------------------------|----------------------------------|-----------------------------------------------|--------------------------------------|--------------------------------------|---------------------------------|----------------|
| Median fruit intake, servings per day   | 0.20 (0.08-0.31)                 | 0.68 (0.55-0.83)                              | 1.41 (1.19-1.68)                     | 2.41 (2.19-2.66)                     | 4.28 (3.52-5.81)                |                |
| <b>Major CVD</b>                        |                                  |                                               |                                      |                                      |                                 |                |
| Major CVD events (N=4,784)              | 1,646 (4.35)                     | 1,160 (3.63)                                  | 1,034 (3.15)                         | 419 (2.85)                           | 525 (2.92)                      |                |
| Age and sex adjusted                    | 1.00                             | 0.94 (0.87-1.02)                              | 0.89 (0.81-0.97)                     | 0.87 (0.77-0.98)                     | 0.79 (0.70-0.90)                | 0.0002         |
| Multivariable adjusted                  | 1.00                             | 0.98 (0.90-1.07)                              | 0.96 (0.87-1.06)                     | 0.96 (0.85-1.09)                     | 0.89 (0.77-1.01)                | 0.1100         |
| <b>MI</b>                               |                                  |                                               |                                      |                                      |                                 |                |
| MI events (N=2,143)                     | 766 (2.02)                       | 507 (1.59)                                    | 439 (1.34)                           | 203 (1.38)                           | 228 (1.27)                      |                |
| Age and sex adjusted                    | 1.00                             | 1.02 (0.91-1.15)                              | 0.93 (0.81-1.06)                     | 1.00 (0.84-1.20)                     | 0.81 (0.67-0.97)                | <0.0001        |
| Multivariable adjusted                  | 1.00                             | 1.05 (0.92-1.19)                              | 1.00 (0.86-1.15)                     | 1.10 (0.91-1.33)                     | 0.90 (0.73-1.10)                | 0.5952         |
| <b>Stroke</b>                           |                                  |                                               |                                      |                                      |                                 |                |
| Stroke events (N=2,234)                 | 759 (2.01)                       | 571 (1.79)                                    | 499 (1.52)                           | 174 (1.18)                           | 231 (1.28)                      |                |
| Age and sex adjusted                    | 1.00                             | 0.87 (0.78-0.98)                              | 0.87 (0.77-0.98)                     | 0.80 (0.67-0.96)                     | 0.86 (0.72-1.02)                | 0.0196         |
| Multivariable adjusted                  | 1.00                             | 0.93 (0.82-1.04)                              | 0.94 (0.82-1.04)                     | 0.87 (0.72-1.05)                     | 0.95 (0.78-1.15)                | 0.3506         |
| <b>CV mortality</b>                     |                                  |                                               |                                      |                                      |                                 |                |
| CV death events (N=1,649)               | 703 (1.87)                       | 385 (1.21)                                    | 299 (0.91)                           | 110 (0.75)                           | 152 (0.84)                      |                |
| Age and sex adjusted                    | 1.00                             | 0.95 (0.84-1.09)                              | 0.78 (0.67-0.90)                     | 0.71 (0.57-0.89)                     | 0.69 (0.56-0.86)                | <0.0001        |
| Multivariable adjusted                  | 1.00                             | 1.03 (0.89-1.19)                              | 0.86 (0.72-1.01)                     | 0.85 (0.67-1.08)                     | 0.83 (0.65-1.06)                | 0.0458         |
| <b>Non-CV mortality</b>                 |                                  |                                               |                                      |                                      |                                 |                |
| Non-CV death events (N=3,809)           | 1,769 (4.67)                     | 782 (2.45)                                    | 629 (1.91)                           | 264 (1.80)                           | 365 (2.03)                      |                |
| Age and sex                             | 1.00                             | 0.76 (0.70-0.83)                              | 0.63 (0.57-0.70)                     | 0.61 (0.53-0.71)                     | 0.58 (0.50-0.67)                | <0.0001        |

|                            |              |                  |                  |                  |                  |         |
|----------------------------|--------------|------------------|------------------|------------------|------------------|---------|
| adjusted                   |              |                  |                  |                  |                  |         |
| Multivariable adjusted     | 1·00         | 0·87 (0·79-0·96) | 0·78 (0·69-0·87) | 0·81 (0·69-0·95) | 0·82 (0·70-0·97) | 0·0008  |
| <b>Mortality</b>           |              |                  |                  |                  |                  |         |
| Mortality events (N=5,796) | 2,626 (6·94) | 1,241 (3·89)     | 982 (2·99)       | 400 (2·72)       | 547 (3·04)       |         |
| Age and sex adjusted       | 1·00         | 0·82 (0·76-0·88) | 0·79 (0·72-0·87) | 0·82 (0·72-0·93) | 0·65 (0·57-0·72) | <0·0001 |
| Multivariable adjusted     | 1·00         | 0·91 (0·85-0·99) | 0·79 (0·72-0·87) | 0·82 (0·72-0·93) | 0·81 (0·72-0·93) | <0·0001 |

Major CVD: defined as death from cardiovascular causes and nonfatal myocardial infarction, stroke, and heart failure. MI: myocardial infarction; CV mortality: cardiovascular mortality; Non-CV mortality: non-cardiovascular mortality. Crude event rates shown. Age and sex adjusted: adjusted for age, sex, center (random effect), multivariable adjusted: adjusted for age, sex, center (random effect), energy intake, current smoker, diabetes, urban/rural location, physical activity, education level, tertiles of white meat, red meat, breads and cereals and vegetable intake. Additional sensitivity analyses with waist-to-hip ratio, hypertension status and statin medication used in the model did not materially alter estimates of association (Shown in the Supplementary Appendix).

Table S7: Association of vegetable intake with cardiovascular outcomes and mortality.

| <b>All participants<br/>(N=135,335)</b> | <b>&lt;1/day<br/>(N=34,221)</b> | <b>1 to &lt;2/day<br/>(N=32,976)</b> | <b>2 to &lt;3/day<br/>(N=46,489)</b> | <b>&gt;3/day<br/>(N=21,649)</b> | <b>P-trend</b> |
|-----------------------------------------|---------------------------------|--------------------------------------|--------------------------------------|---------------------------------|----------------|
| Median vegetable intake, servings       | 0.55 (0.31-0.78)<br>per day     | 1.53 (1.25-1.70)<br>per day          | 2.06 (2.01-2.23)<br>per day          | 4.13 (3.48-5.31)<br>per day     |                |
| <b>Major CVD</b>                        |                                 |                                      |                                      |                                 |                |
| Major CVD events (N=4,784)              | 1,304 (3.81)                    | 1,172 (3.55)                         | 1,763 (3.79)                         | 545 (2.52)                      |                |
| Age and sex adjusted                    | 1.00                            | 0.98 (0.90-1.07)                     | 1.07 (0.98-1.17)                     | 0.89 (0.80-1.00)                | 0.5992         |
| Multivariable adjusted                  | 1.00                            | 1.01 (0.92-1.11)                     | 1.13 (1.02-1.24)                     | 0.96 (0.85-1.09)                | 0.3763         |
| <b>MI</b>                               |                                 |                                      |                                      |                                 |                |
| MI events (N=2,143)                     | 661 (1.93)                      | 610 (1.85)                           | 595 (1.28)                           | 277 (1.28)                      |                |
| Age and sex adjusted                    | 1.00                            | 1.04 (0.92-1.16)                     | 1.08 (0.95-1.24)                     | 0.89 (0.76-1.04)                | 0.5031         |
| Multivariable adjusted                  | 1.00                            | 1.06 (0.93-1.20)                     | 1.13 (0.98-1.30)                     | 0.93 (0.78-1.11)                | 0.9849         |
| <b>Stroke</b>                           |                                 |                                      |                                      |                                 |                |
| Stroke events (N=2,234)                 | 497 (1.45)                      | 447 (1.36)                           | 1,074 (2.31)                         | 216 (1.00)                      |                |
| Age and sex adjusted                    | 1.00                            | 0.97 (0.85-1.11)                     | 1.10 (0.96-1.26)                     | 1.01 (0.84-1.23)                | 0.2795         |
| Multivariable adjusted                  | 1.00                            | 0.99 (0.85-1.14)                     | 1.13 (0.98-1.31)                     | 1.09 (0.89-1.34)                | 0.0783         |
| <b>CV death</b>                         |                                 |                                      |                                      |                                 |                |
| CV death events (N=1,649)               | 680 (1.99)                      | 440 (1.33)                           | 364 (0.78)                           | 165 (0.76)                      |                |
| Age and sex adjusted                    | 1.00                            | 0.86 (0.75-0.98)                     | 0.89 (0.76-1.04)                     | 0.79 (0.65-0.96)                | 0.0130         |
| Multivariable adjusted                  | 1.00                            | 0.89 (0.77-1.02)                     | 0.98 (0.83-1.16)                     | 0.88 (0.71-1.10)                | 0.3979         |
| <b>Non-CV death</b>                     |                                 |                                      |                                      |                                 |                |
| Non-CV death events (N=3,809)           | 1,634 (4.77)                    | 939 (2.85)                           | 863 (1.86)                           | 373 (1.72)                      |                |
| Age and sex adjusted                    | 1.00                            | 0.81 (0.74-0.88)                     | 0.73 (0.67-0.81)                     | 0.71 (0.62-0.81)                | <0.0001        |
| Multivariable adjusted                  | 1.00                            | 0.92 (0.84-1.01)                     | 0.90 (0.80-1.01)                     | 0.96 (0.83-1.11)                | 0.2184         |
| <b>Mortality</b>                        |                                 |                                      |                                      |                                 |                |
| Mortality events (N=5,796)              | 2,462 (7.19)                    | 1,457 (4.42)                         | 1,303 (2.80)                         | 574 (2.65)                      |                |
| Age and sex adjusted                    | 1.00                            | 0.82 (0.76-0.87)                     | 0.78 (0.71-0.85)                     | 0.73 (0.66-0.81)                | <0.0001        |
| Multivariable adjusted                  | 1.00                            | 0.90 (0.83-0.97)                     | 0.93 (0.84-1.01)                     | 0.93 (0.83-1.05)                | 0.1216         |

Major CVD: defined as death from cardiovascular causes and nonfatal myocardial infarction, stroke, and heart failure. MI: myocardial infarction; CV mortality: cardiovascular mortality; Non-CV mortality: non-cardiovascular mortality. Crude event rates shown. Age and sex adjusted: adjusted for age, sex, center (random effect),



multivariable adjusted: adjusted for age, sex, center (random effect), energy intake, current smoker, diabetes, urban/rural location, physical activity, education level, tertiles of white meat, red meat, breads and cereals and fruit intake. Additional sensitivity analyses with waist-to-hip ratio, hypertension status and statin medication used in the model did not materially alter estimates of association (Shown in the Supplementary Appendix).

Table S8: Association of legume intake with cardiovascular outcomes and mortality.

| <b>All participants<br/>(N=135,335)</b> | <b>&lt;1/month<br/>(N=37,849)</b> | <b>1/week to<br/>&lt;1/week<br/>(N=24,487)</b> | <b>1 to &lt;3/week<br/>(N=48,426)</b> | <b>3/week to<br/>&lt;1/day<br/>(N=29,194)</b> | <b>&gt;1/day<br/>(N=13,060)</b> | <b>P-trend</b> |
|-----------------------------------------|-----------------------------------|------------------------------------------------|---------------------------------------|-----------------------------------------------|---------------------------------|----------------|
| Median legume intake, servings          | 0·00 (0·00-0·009) per day         | 0·087 (0·065-0·11) per day                     | 0·26 (0·19-0·33) per day              | 0·61 (0·52-0·75) per day                      | 1·42 (1·14-1·59) per day        |                |
| <b>Major CVD</b>                        |                                   |                                                |                                       |                                               |                                 |                |
| Major CVD events (N=4,784)              | 645 (3·99)                        | 1,022 (3·59)                                   | 1,622 (3·35)                          | 1,071 (3·67)                                  | 424 (3·25)                      |                |
| Age and sex adjusted                    | 1·00                              | 0·89 (0·80-0·99)                               | 0·84 (0·76-0·94)                      | 0·89 (0·79-1·00)                              | 0·86 (0·74-0·99)                | 0·0612         |
| Multivariable adjusted                  | 1·00                              | 0·88 (0·79-0·98)                               | 0·86 (0·77-0·96)                      | 0·93 (0·82-1·05)                              | 0·83 (0·71-0·98)                | 0·1845         |
| <b>MI</b>                               |                                   |                                                |                                       |                                               |                                 |                |
| MI events (N=2,143)                     | 216 (1·34)                        | 402 (1·41)                                     | 713 (1·47)                            | 572 (1·96)                                    | 240 (1·84)                      |                |
| Age and sex adjusted                    | 1·00                              | 0·98 (0·82-1·18)                               | 0·88 (0·74-1·05)                      | 0·92 (0·76-1·05)                              | 0·89 (0·71-1·11)                | 0·2299         |
| Multivariable adjusted                  | 1·00                              | 0·99 (0·92-1·19)                               | 0·92 (0·77-1·11)                      | 0·95 (0·78-1·16)                              | 0·86 (0·67-1·10)                | 0·2617         |
| <b>Stroke</b>                           |                                   |                                                |                                       |                                               |                                 |                |
| Stroke events (N=2,234)                 | 353 (2·18)                        | 538 (1·89)                                     | 764 (1·58)                            | 414 (1·42)                                    | 165 (1·26)                      |                |
| Age and sex adjusted                    | 1·00                              | 0·84 (0·73-0·97)                               | 0·83 (0·72-0·96)                      | 0·91 (0·77-1·07)                              | 0·96 (0·77-1·20)                | 0·6272         |
| Multivariable adjusted                  | 1·00                              | 0·81 (0·70-0·94)                               | 0·81 (0·69-0·94)                      | 0·93 (0·78-1·16)                              | 0·88 (0·69-1·12)                | 0·6262         |
| <b>CV death</b>                         |                                   |                                                |                                       |                                               |                                 |                |
| CV death events (N=1,649)               | 215 (1·33)                        | 278 (0·98)                                     | 499 (1·03)                            | 436 (1·49)                                    | 221 (1·69)                      |                |
| Age and sex adjusted                    | 1·00                              | 0·91 (0·74-1·10)                               | 0·78 (0·64-0·94)                      | 0·74 (0·60-0·92)                              | 0·72 (0·57-0·92)                | 0·0032         |
| Multivariable adjusted                  | 1·00                              | 0·90 (0·72-1·11)                               | 0·84 (0·68-1·04)                      | 0·89 (0·71-1·14)                              | 0·87 (0·66-1·14)                | 0·4414         |
| <b>Non-CV death</b>                     |                                   |                                                |                                       |                                               |                                 |                |
| Non-CV death events (N=3,809)           | 520 (3·22)                        | 656 (2·30)                                     | 1,186 (2·45)                          | 965 (3·31)                                    | 482 (3·69)                      |                |
| Age and sex                             | 1·00                              | 0·76 (0·70-0·83)                               | 0·63 (0·57-0·70)                      | 0·61 (0·53-0·71)                              | 0·58 (0·50-0·67)                | <0·0001        |

|                            |            |                  |                  |                  |                  |         |
|----------------------------|------------|------------------|------------------|------------------|------------------|---------|
| adjusted                   |            |                  |                  |                  |                  |         |
| Multivariable adjusted     | 1·00       | 0·87 (0·79-0·96) | 0·78 (0·69-0·87) | 0·81 (0·69-0·95) | 0·82 (0·70-0·97) | 0·0019  |
| <b>Mortality</b>           |            |                  |                  |                  |                  |         |
| Mortality events (N=5,796) | 776 (4·80) | 985 (3·46)       | 1,778 (3·67)     | 1,503 (5·15)     | 754 (5·77)       |         |
| Age and sex adjusted       | 1·00       | 0·76 (0·69-0·85) | 0·70 (0·63-0·77) | 0·65 (0·58-0·72) | 0·59 (0·51-0·67) | <0·0001 |
| Multivariable adjusted     | 1·00       | 0·80 (0·72-0·89) | 0·80 (0·71-0·89) | 0·80 (0·71-0·90) | 0·74 (0·64-0·86) | 0·0013  |

Major CVD: defined as death from cardiovascular causes and nonfatal myocardial infarction, stroke, and heart failure. MI: myocardial infarction; CV death: cardiovascular mortality; Non-CV death: non-cardiovascular mortality. Crude event rates shown. Age and sex adjusted: adjusted for age, sex, center (random effect), multivariable adjusted: adjusted for age, sex, center (random effect), energy intake, current smoker, diabetes, urban/rural location, physical activity, education level, tertiles of white meat, red meat, breads and cereals intake. Additional sensitivity analyses with waist-to-hip ratio, hypertension status and statin medication used in the model did not materially alter estimates of association (Shown in the Supplementary Appendix).

Table S9: Association of total fruit, vegetable and legume intake with total mortality by region using region-specific tertiles.

| <b>All participants (N=135,335)</b>                 | <b>T1</b>                | <b>T2</b>                | <b>T3</b>                 |
|-----------------------------------------------------|--------------------------|--------------------------|---------------------------|
| <b>South Asia (N=29,560)</b>                        |                          |                          |                           |
| N                                                   | 9,755                    | 9,755                    | 10,050                    |
| Mortality events (N=2,527)                          | 1,130 (11·58)            | 832 (8·53)               | 565 (5·62)                |
| Median fruit, vegetable and legume intake, servings | 1·21 (0·88-1·48) per day | 2·30 (2·00-2·65) per day | 4·37 (3·57-5·77) per day  |
| Age and sex adjusted                                | 1·00                     | 0·81 (0·74-0·89)         | 0·60 (0·54-0·67)          |
| Multivariable adjusted                              | 1·00                     | 0·84 (0·76-0·93)         | 0·68 (0·60-0·78)          |
| <b>China (N=42,152)</b>                             |                          |                          |                           |
| N                                                   | 13,911                   | 13,909                   | 14,332                    |
| Mortality events (N=1,156)                          | 535 (3·85)               | 562 (2·60)               | 259 (1·81)                |
| Median fruit, vegetable and legume intake, servings | 2·13 (1·46-2·35) per day | 2·81 (2·65-2·98) per day | 3·88 (3·48-4·59) per day  |
| Age and sex adjusted                                | 1·00                     | 0·77 (0·67-0·89)         | 0·56 (0·48-0·66)          |
| Multivariable adjusted                              | 1·00                     | 0·95 (0·82-1·09)         | 0·83 (0·69-0·98)          |
| <b>Southeast Asia (N=10,038)</b>                    |                          |                          |                           |
| N                                                   | 3,315                    | 3,310                    | 3,413                     |
| Mortality events (N=327)                            | 99 (2·99)                | 114 (3·44)               | 114 (3·34)                |
| Median fruit, vegetable and legume intake, servings | 1·27 (0·77-1·68) per day | 2·68 (2·28-3·27) per day | 5·38 (4·37-7·72) per day  |
| Age and sex adjusted                                | 1·00                     | 1·22 (0·93-1·60)         | 1·13 (0·86-1·48)          |
| Multivariable adjusted                              | 1·00                     | 1·35 (1·00-1·82)         | 1·24 (0·89-1·73)          |
| <b>Africa (N=4,558)</b>                             |                          |                          |                           |
| N                                                   | 1,504                    | 1,505                    | 1549                      |
| Mortality events (N=451)                            | 154 (10·24)              | 124 (8·24)               | 173 (11·17)               |
| Median fruit, vegetable and legume intake, servings | 0·66 (0·43-0·90) per day | 2·12 (1·69-2·59) per day | 5·38 (4·06-8·65) per day  |
| Age and sex adjusted                                | 1·00                     | 0·94 (0·64-1·27)         | 0·83 (0·60-1·16)          |
| Multivariable adjusted                              | 1·00                     | 1·30 (0·72-2·35)         | 1·42 (0·76-2·65)          |
| <b>North America/Europe (N=14,916)</b>              |                          |                          |                           |
| N                                                   | 4,923                    | 4,922                    | 5,071                     |
| Mortality events (n=328)                            | 129 (2·62)               | 116 (2·36)               | 83 (1·64)                 |
| Median fruit, vegetable and legume intake, servings | 2·76 (2·05-3·35) per day | 5·00 (4·43-5·65) per day | 8·35 (7·25-10·23) per day |
| Age and sex adjusted                                | 1·00                     | 0·94 (0·64-1·27)         | 0·83 (0·60-1·16)          |
| Multivariable adjusted                              | 1·00                     | 1·10 (0·84-1·44)         | 0·82 (0·59-1·14)          |
| <b>Middle East (N=11,485)</b>                       |                          |                          |                           |
| N                                                   | 3,790                    | 3,791                    | 3,904                     |
| Mortality events (N=208)                            | 74 (1·95)                | 62 (1·64)                | 72 (1·84)                 |
| Median fruit, vegetable and legume intake, servings | 3·15 (2·49-3·63) per day | 5·18 (4·62-5·78) per day | 8·62 (7·30-10·90) per day |

|                                                     |                          |                          |                          |
|-----------------------------------------------------|--------------------------|--------------------------|--------------------------|
| servings                                            |                          |                          |                          |
| Age and sex adjusted                                | 1·00                     | 0·90 (0·64-1·27)         | 0·83 (0·60-1·16)         |
| Multivariable adjusted                              | 1·00                     | 0·90 (0·63-1·29)         | 0·78 (0·50-1·18)         |
| <b>South America (N=22,626)</b>                     |                          |                          |                          |
| N                                                   | 7,466                    | 7,467                    | 7,693                    |
| Mortality events (n=799)                            | 335 (4·49)               | 267 (3·58)               | 197 (2·56)               |
| Median fruit, vegetable and legume intake, servings | 2·19 (1·52-2·76) per day | 4·55 (3·91-5·21) per day | 7·82 (6·74-9·71) per day |
| Age and sex adjusted                                | 1·00                     | 0·89 (0·75-1·05)         | 0·79 (0·65-0·96)         |
| Multivariable adjusted                              | 1·00                     | 0·92 (0·77-1·09)         | 0·84 (0·67-1·04)         |

Age and sex adjusted: adjusted for age, sex, center (random effect), multivariable adjusted: adjusted for age, sex, center (random effect), energy intake, current smoker, diabetes, urban/rural location, physical activity, education level, tertiles of white meat, red meat, breads and cereals intake. P for heterogeneity=0·0174.

Table S10: Association of fruit intake with total mortality by region using region-specific tertiles.

| <b>All participants<br/>(N=135,335)</b> | <b>T1</b>                     | <b>T2</b>                    | <b>T3</b>                   |
|-----------------------------------------|-------------------------------|------------------------------|-----------------------------|
| <b>South Asia (N=29,560)</b>            |                               |                              |                             |
| N                                       | 9,756                         | 9,753                        | 10,051                      |
| Mortality events<br>(N=2,527)           | 1,170 (11·99)                 | 794 (8·14)                   | 563 (5·60)                  |
| Median fruit intake,<br>servings        | 0·07 (0·024-<br>0·13) per day | 0·36 (0·27-<br>0·48) per day | 1·22 (0·87-2·00)<br>per day |
| Age and sex adjusted                    | 1·00                          | 0·78 (0·72-<br>0·86)         | 0·61 (0·55-0·68)            |
| Multivariable adjusted                  | 1·00                          | 0·88 (0·80-<br>0·98)         | 0·80 (0·70-0·91)            |
| <b>China (N=42,152)</b>                 |                               |                              |                             |
| N                                       | 13,911                        | 13,907                       | 14,334                      |
| Mortality events<br>(N=1,156)           | 537 (3·86)                    | 346 (2·49)                   | 273 (1·90)                  |
| Median fruit intake,<br>servings        | 0·23 (0·14-<br>0·33) per day  | 0·67 (0·54-<br>0·83) per day | 1·65 (1·28-2·35)<br>per day |
| Age and sex adjusted                    | 1·00                          | 0·75 (0·65-<br>0·86)         | 0·57 (0·49-0·87)            |
| Multivariable adjusted                  | 1·00                          | 0·88 (0·77-<br>1·02)         | 0·78 (0·66-0·93)            |
| <b>Southeast Asia (N=10,038)</b>        |                               |                              |                             |
| N                                       | 3,313                         | 3,341                        | 3,384                       |
| Mortality events (N=327)                | 117 (3·53)                    | 97 (2·90)                    | 113 (3·34)                  |
| Median fruit intake,<br>servings        | 0·37 (0·17-<br>0·57) per day  | 1·15 (0·93-<br>1·24) per day | 2·28 (1·96-3·31)<br>per day |
| Age and sex adjusted                    | 1·00                          | 0·81 (0·61-<br>1·07)         | 0·95 (0·72-1·24)            |
| Multivariable adjusted                  | 1·00                          | 0·83 (0·61-<br>1·13)         | 1·02 (0·73-1·43)            |
| <b>Africa (N=4,558)</b>                 |                               |                              |                             |
| N                                       | 1,504                         | 1,504                        | 1,550                       |
| Mortality events (N=451)                | 147 (9·77)                    | 136 (9·04)                   | 168 (10·84)                 |
| Median fruit intake,<br>servings        | 0·12 (0·00-<br>0·25) per day  | 0·89 (0·61-<br>1·14) per day | 3·18 (2·21-6·45)<br>per day |
| Age and sex adjusted                    | 1·00                          | 1·15 (0·90-<br>1·48)         | 0·92 (0·67-1·26)            |
| Multivariable adjusted                  | 1·00                          | 1·64 (0·94-<br>2·86)         | 1·14 (0·63-2·07)            |
| <b>North America/Europe (N=14,916)</b>  |                               |                              |                             |
| N                                       | 4,922                         | 4,923                        | 5,071                       |
| Mortality events (n=328)                | 117 (2·38)                    | 116 (2·36)                   | 95 (1·87)                   |
| Median fruit intake,<br>servings        | 0·72 (0·44-<br>0·96) per day  | 0·67 (1·43-<br>1·94) per day | 3·21 (2·64-4·07)<br>per day |
| Age and sex adjusted                    | 1·00                          | 0·92 (0·71-<br>1·19)         | 0·75 (0·57-0·99)            |
| Multivariable adjusted                  | 1·00                          | 1·05 (0·80-<br>1·38)         | 1·12 (0·85-1·47)            |
| <b>Middle East (N=11,485)</b>           |                               |                              |                             |
| N                                       | 3,790                         | 3,791                        | 3,904                       |

|                                 |                          |                          |                          |
|---------------------------------|--------------------------|--------------------------|--------------------------|
| Mortality events (N=208)        | 68 (1.79)                | 59 (1.56)                | 81 (2.07)                |
| Median fruit intake, servings   | 1.36 (0.96-1.63) per day | 2.68 (2.29-3.19) per day | 5.78 (4.55-7.75) per day |
| Age and sex adjusted            | 1.00                     | 0.82 (0.58-1.17)         | 0.87 (0.61-1.23)         |
| Multivariable adjusted          | 1.00                     | 0.86 (0.59-1.25)         | 0.88 (0.57-1.35)         |
| <b>South America (N=22,626)</b> |                          |                          |                          |
| N                               | 7,466                    | 7,467                    | 7,693                    |
| Mortality events (n=799)        | 283 (3.79)               | 264 (3.54)               | 252 (3.28)               |
| Median fruit intake, servings   | 0.56 (0.29-0.77) per day | 1.50 (1.23-1.79) per day | 3.35 (2.63-4.59) per day |
| Age and sex adjusted            | 1.00                     | 0.82 (0.69-0.97)         | 0.73 (0.61-0.87)         |
| Multivariable adjusted          | 1.00                     | 0.88 (0.73-1.05)         | 0.78 (0.64-0.95)         |

Age and sex adjusted: adjusted for age, sex, center (random effect), multivariable adjusted: adjusted for age, sex, center (random effect), energy intake, current smoker, diabetes, urban/rural location, physical activity, education level, tertiles of white meat, red meat, breads and cereals and vegetable intake. P for heterogeneity=0.1514.

Table S11: Association of vegetable intake with total mortality by region using region-specific tertiles.

| <b>All participants<br/>(N=135,335)</b> | <b>T1</b>                    | <b>T2</b>                    | <b>T3</b>                   |
|-----------------------------------------|------------------------------|------------------------------|-----------------------------|
| <b>South Asia (N=29,560)</b>            |                              |                              |                             |
| N                                       | 9,754                        | 9,748                        | 10,058                      |
| Mortality events<br>(N=2,527)           | 1,087 (11·14)                | 843 (8·65)                   | 597 (5·94)                  |
| Median vegetable intake,<br>servings    | 0·37 (0·24-<br>0·51) per day | 0·96 (0·80-<br>1·17) per day | 2·16 (1·74-2·91)<br>per day |
| Age and sex adjusted                    | 1·00                         | 0·85 (0·77-<br>0·94)         | 0·65 (0·58-0·72)            |
| Multivariable adjusted                  | 1·00                         | 0·95 (0·86-<br>1·06)         | 0·81 (0·71-0·93)            |
| <b>China (N=42,152)</b>                 |                              |                              |                             |
| N                                       | 10,943                       | 17,367                       | 13,842                      |
| Mortality events<br>(N=1,156)           | 383 (3·50)                   | 484 (2·79)                   | 289 (2·09)                  |
| Median vegetable intake,<br>servings    | 1·20 (0·31-<br>1·60) per day | 2·00 (2·00-<br>2·01) per day | 2·10 (2·06-2·20)<br>per day |
| Age and sex adjusted                    | 1·00                         | 0·98 (0·84-<br>1·13)         | 0·77 (0·63-0·94)            |
| Multivariable adjusted                  | 1·00                         | 1·20 (1·03-<br>1·40)         | 1·08 (0·90-1·29)            |
| <b>Southeast Asia (N=10,038)</b>        |                              |                              |                             |
| N                                       | 3,315                        | 3,311                        | 3,412                       |
| Mortality events (N=327)                | 102 (3·08)                   | 114 (3·44)                   | 111 (3·25)                  |
| Median vegetable intake,<br>servings    | 0·51 (0·27-<br>0·69) per day | 1·14 (0·91-<br>1·50) per day | 2·75 (1·98-4·09)<br>per day |
| Age and sex adjusted                    | 1·00                         | 1·17 (0·89-<br>1·13)         | 1·09 (0·67-0·94)            |
| Multivariable adjusted                  | 1·00                         | 1·14 (0·85-<br>1·54)         | 1·11 (0·80-1·55)            |
| <b>Africa (N=4,558)</b>                 |                              |                              |                             |
| N                                       | 1,502                        | 1,506                        | 1,550                       |
| Mortality events (N=451)                | 155 (10·32)                  | 152 (10·09)                  | 144 (9·29)                  |
| Median vegetable intake,<br>servings    | 0·37 (0·23-<br>0·48) per day | 0·88 (0·72-<br>1·05) per day | 1·93 (1·54-2·56)<br>per day |
| Age and sex adjusted                    | 1·00                         | 1·03 (0·81-<br>1·31)         | 0·99 (0·74-1·31)            |
| Multivariable adjusted                  | 1·00                         | 1·09 (0·69-<br>1·71)         | 1·06 (0·67-1·69)            |
| <b>North America/Europe (N=14,916)</b>  |                              |                              |                             |
| N                                       | 4,922                        | 4,922                        | 5,072                       |
| Mortality events (n=328)                | 140 (2·84)                   | 107 (2·17)                   | 81 (1·60)                   |
| Median vegetable intake,<br>servings    | 1·42 (1·02-<br>1·78) per day | 2·87 (2·49-<br>3·30) per day | 5·21 (4·40-6·53)<br>per day |
| Age and sex adjusted                    | 1·00                         | 0·85 (0·65-<br>1·09)         | 0·62 (0·47-1·09)            |
| Multivariable adjusted                  | 1·00                         | 0·94 (0·71-<br>1·23)         | 0·72 (0·52-1·00)            |
| <b>Middle East (N=11,485)</b>           |                              |                              |                             |
| N                                       | 3,791                        | 3,789                        | 3,905                       |



|                                   |                          |                          |                          |
|-----------------------------------|--------------------------|--------------------------|--------------------------|
| Mortality events (N=208)          | 79 (2·08)                | 69 (1·82)                | 60 (1·54)                |
| Median vegetable intake, servings | 0·96 (0·68-1·19) per day | 1·79 (1·58-2·00) per day | 2·85 (2·49-3·46) per day |
| Age and sex adjusted              | 1·00                     | 1·02 (0·73-1·42)         | 0·97 (0·68-1·40)         |
| Multivariable adjusted            | 1·00                     | 1·03 (0·73-1·44)         | 1·01 (0·67-1·51)         |
| <b>South America (N=22,626)</b>   |                          |                          |                          |
| N                                 | 7,466                    | 7,468                    | 7,692                    |
| Mortality events (n=799)          | 346 (4·63)               | 275 (3·68)               | 178 (2·31)               |
| Median vegetable intake, servings | 1·02 (0·70-1·30) per day | 2·28 (1·90-2·75) per day | 4·33 (3·71-5·41) per day |
| Age and sex adjusted              | 1·00                     | 0·98 (0·83-1·15)         | 0·83 (0·67-1·03)         |
| Multivariable adjusted            | 1·00                     | 1·03 (0·86-1·20)         | 0·96 (0·76-1·21)         |

Age and sex adjusted: adjusted for age, sex, center (random effect), multivariable adjusted: adjusted for age, sex, center (random effect), energy intake, current smoker, diabetes, urban/rural location, physical activity, education level, tertiles of white meat, red meat, breads and cereals and fruit intake. P for heterogeneity=0·0434.

Table S12: Association of legume intake with total mortality by region using region-specific tertiles.

| <b>All participants<br/>(N=135,335)</b> | <b>T1</b>                       | <b>T2</b>                     | <b>T3</b>                   |
|-----------------------------------------|---------------------------------|-------------------------------|-----------------------------|
| <b>South Asia (N=29,560)</b>            |                                 |                               |                             |
| N                                       | 9,755                           | 9,752                         | 10,053                      |
| Mortality events<br>(N=2,527)           | 859 (8·81)                      | 834 (8·55)                    | 834 (8·30)                  |
| Median legume intake,<br>servings       | 0·28 (0·17-<br>0·36) per day    | 0·64 (0·54-<br>0·74) per day  | 1·24 (1·03-1·62)<br>per day |
| Age and sex adjusted                    | 1·00                            | 0·86 (0·78-<br>0·95)          | 0·81 (0·73-0·89)            |
| Multivariable adjusted                  | 1·00                            | 0·98 (0·88-<br>1·09)          | 0·96 (0·85-1·08)            |
| <b>China (N=42,152)</b>                 |                                 |                               |                             |
| N                                       | 13,494                          | 14,303                        | 14,355                      |
| Mortality events<br>(N=1,156)           | 481 (3·56)                      | 328 (2·29)                    | 347 (2·42)                  |
| Median legume intake,<br>servings       | 0·033 (0·00-<br>0·059) per day  | 0·15 (0·11-<br>0·19) per day  | 0·38 (0·29-0·52)<br>per day |
| Age and sex adjusted                    | 1·00                            | 0·75 (0·66-<br>0·86)          | 0·66 (0·55-0·80)            |
| Multivariable adjusted                  | 1·00                            | 0·83 (0·71-<br>0·97)          | 0·88 (0·75-1·04)            |
| <b>Southeast Asia (N=10,038)</b>        |                                 |                               |                             |
| N                                       | 3,267                           | 3,367                         | 3,3402                      |
| Mortality events (N=327)                | 120 (3·67)                      | 84 (2·49)                     | 123 (3·62)                  |
| Median legume intake,<br>servings       | 0·00 (0·00-<br>0·037) per day   | 0·22 (0·16-<br>0·23) per day  | 0·50 (0·42-0·87)<br>per day |
| Age and sex adjusted                    | 1·00                            | 0·68 (0·50-<br>0·92)          | 0·91 (0·67-1·23)            |
| Multivariable adjusted                  | 1·00                            | 0·73 (0·53-<br>1·00)          | 0·86 (0·61-1·22)            |
| <b>Africa (N=4,558)</b>                 |                                 |                               |                             |
| N                                       | 1,910                           | 2,648                         | N/A                         |
| Mortality events (N=451)                | 170 (8·90)                      | 281 (10·61)                   |                             |
| Median legume intake,<br>servings       | 0·00 (0·00-<br>0·00) per day    | 0·17 (0·090-<br>0·35) per day |                             |
| Age and sex adjusted                    | 1·00                            | 0·90 (0·72-<br>1·12)          |                             |
| Multivariable adjusted                  | 1·00                            | 0·89 (0·60-<br>1·32)          |                             |
| <b>North America/Europe (N=14,916)</b>  |                                 |                               |                             |
| N                                       | 4,921                           | 4,931                         | 5,064                       |
| Mortality events (n=328)                | 124 (2·52)                      | 95 (1·93)                     | 109 (2·15)                  |
| Median legume intake,<br>servings       | 0·059 (0·034-<br>0·087) per day | 0·18 (0·15-<br>0·22) per day  | 0·43 (0·33-0·61)<br>per day |
| Age and sex adjusted                    | 1·00                            | 0·69 (0·53-<br>0·90)          | 0·78 (0·60-1·01)            |
| Multivariable adjusted                  | 1·00                            | 0·75 (0·57-<br>1·00)          | 0·93 (0·70-1·24)            |
| <b>Middle East (N=11,485)</b>           |                                 |                               |                             |
| N                                       | 3,807                           | 3,773                         | 3,905                       |

|                                 |                            |                          |                          |
|---------------------------------|----------------------------|--------------------------|--------------------------|
| Mortality events (N=208)        | 58 (1·52)                  | 78 (2·07)                | 72 (1·84)                |
| Median legume intake, servings  | 0·16 (0·10-0·21) per day   | 0·35 (0·35-0·41) per day | 0·68 (0·57-0·87) per day |
| Age and sex adjusted            | 1·00                       | 1·36 (0·96-1·93)         | 1·19 (0·82-1·71)         |
| Multivariable adjusted          | 1·00                       | 1·40 (0·97-2·02)         | 1·20 (0·80-1·79)         |
| <b>South America (N=22,626)</b> |                            |                          |                          |
| N                               | 7,702                      | 7,275                    | 7,649                    |
| Mortality events (n=799)        | 341 (4·43)                 | 278 (3·82)               | 180 (2·35)               |
| Median legume intake, servings  | 0·038 (0·00-0·087) per day | 0·19 (0·19-0·25) per day | 0·66 (0·53-1·45) per day |
| Age and sex adjusted            | 1·00                       | 1·09 (0·91-1·30)         | 1·00 (0·80-1·30)         |
| Multivariable adjusted          | 1·00                       | 1·13 (0·94-1·36)         | 1·09 (0·80-1·26)         |

Age and sex adjusted: adjusted for age, sex, center (random effect), multivariable adjusted: adjusted for age, sex, center (random effect), energy intake, current smoker, diabetes, urban/rural location, physical activity, education level, tertiles of white meat, red meat, breads and cereals intake. P for heterogeneity=0·1794.

Table S13: Association of raw vegetable intake with total mortality by region using region-specific tertiles.

| <b>All participants<br/>(N=135,335)</b>  | <b>T1</b>                      | <b>T2</b>                     | <b>T3</b>                   |
|------------------------------------------|--------------------------------|-------------------------------|-----------------------------|
| <b>South Asia (N=29,560)</b>             |                                |                               |                             |
| N                                        | 15,949                         | 13,611                        | N/A                         |
| Mortality events<br>(N=2,527)            | 1,783 (11·18)                  | 744 (5·47)                    |                             |
| Median raw vegetable<br>intake, servings | 0·00 (0·00-<br>0·00) per day   | 0·10 (0·036-<br>0·24) per day |                             |
| Age and sex adjusted                     | 1·00                           | 0·67 (0·61-<br>0·74)          |                             |
| Multivariable adjusted                   | 1·00                           | 0·88 (0·77-<br>1·00)          |                             |
| <b>Southeast Asia (N=10,038)</b>         |                                |                               |                             |
| N                                        | 3,320                          | 3,294                         | 3,422                       |
| Mortality events (N=327)                 | 107 (3·22)                     | 114 (3·46)                    | 106 (3·10)                  |
| Median raw vegetable<br>intake, servings | 0·051 (0·00-<br>0·077) per day | 0·23 (0·17-<br>0·33) per day  | 0·77 (0·51-1·15)<br>per day |
| Age and sex adjusted                     | 1·00                           | 1·09 (0·83-<br>1·42)          | 0·98 (0·75-1·28)            |
| Multivariable adjusted                   | 1·00                           | 1·01 (0·76-<br>1·34)          | 0·95 (0·70-1·30)            |
| <b>Africa (N=4,558)</b>                  |                                |                               |                             |
| N                                        | 2,846                          | 1,712                         | N/A                         |
| Mortality events (N=451)                 | 235 (8·26)                     | 216 (12·62)                   |                             |
| Median raw vegetable<br>intake, servings | 0·00 (0·00-<br>0·00) per day   | 0·23 (0·069-<br>0·50) per day |                             |
| Age and sex adjusted                     | 1·00                           | 0·95 (0·71-<br>1·27)          |                             |
| Multivariable adjusted                   | 1·00                           | 1·28 (0·71-<br>2·31)          |                             |
| <b>North America/Europe (N=14,916)</b>   |                                |                               |                             |
| N                                        | 4,922                          | 4,921                         | 5,073                       |
| Mortality events (n=328)                 | 143 (2·91)                     | 98 (1·99)                     | 87 (1·71)                   |
| Median raw vegetable<br>intake, servings | 0·84 (0·56-<br>1·07) per day   | 1·87 (1·59-<br>2·17) per day  | 3·47 (2·92-4·41)<br>per day |
| Age and sex adjusted                     | 1·00                           | 0·75 (0·58-<br>0·98)          | 0·67 (0·51-0·88)            |
| Multivariable adjusted                   | 1·00                           | 0·85 (0·65-<br>1·12)          | 0·81 (0·59-1·10)            |
| <b>Middle East (N=11,485)</b>            |                                |                               |                             |
| N                                        | 3,790                          | 3,789                         | 3,906                       |
| Mortality events (N=208)                 | 89(2·35)                       | 54 (1·43)                     | 65 (1·43)                   |
| Median raw vegetable<br>intake, servings | 0·31 (0·22-<br>0·46) per day   | 0·84 (0·72-<br>0·98) per day  | 1·53 (1·32-1·91)<br>per day |
| Age and sex adjusted                     | 1·00                           | 0·66 (0·46-<br>0·94)          | 0·73 (0·52-1·03)            |
| Multivariable adjusted                   | 1·00                           | 0·70 (0·48-<br>1·01)          | 0·79 (0·54-1·15)            |
| <b>South America (N=22,626)</b>          |                                |                               |                             |
| N                                        | 5,705                          | 4,489                         | 12,432                      |
| Mortality events (n=799)                 | 279 (4·89)                     | 182 (4·05)                    | 338 (2·72)                  |
| Median raw vegetable                     | 0·84 (0·56-                    | 1·87 (1·59-                   | 3·47 (2·92-4·41)            |

| intake, servings       | 1·07) per day | 2·17) per day    | per day          |
|------------------------|---------------|------------------|------------------|
| Age and sex adjusted   | 1·00          | 0·99 (0·83-1·19) | 0·84 (0·66-1·07) |
| Multivariable adjusted | 1·00          | 1·05 (0·87-1·27) | 1·01 (0·78-1·31) |

Age and sex adjusted: adjusted for age, sex, center (random effect), multivariable adjusted: adjusted for age, sex, center (random effect), energy intake, current smoker, diabetes, urban/rural location, physical activity, education level, tertiles of white meat, red meat, breads and cereals and fruit intake. P for heterogeneity=0·1055.

Table S14: Association of cooked vegetable intake with total mortality by region using region-specific tertiles.

| <b>All participants<br/>(N=135,335)</b>     | <b>T1</b>                    | <b>T2</b>                    | <b>T3</b>                   |
|---------------------------------------------|------------------------------|------------------------------|-----------------------------|
| <b>South Asia (N=29,560)</b>                |                              |                              |                             |
| N                                           | 9,755                        | 9,755                        | 10,050                      |
| Mortality events<br>(N=2,527)               | 1,043 (10·69)                | 854 (8·75)                   | 630 (6·27)                  |
| Median cooked vegetable<br>intake, servings | 0·33 (0·22-<br>0·46) per day | 0·88 (0·73-<br>1·05) per day | 2·00 (1·59-2·70)<br>per day |
| Age and sex adjusted                        | 1·00                         | 0·83 (0·76-<br>0·92)         | 0·66 (0·59-0·73)            |
| Multivariable adjusted                      | 1·00                         | 0·93 (0·84-<br>1·04)         | 0·82 (0·71-0·94)            |
| <b>Southeast Asia (N=10,038)</b>            |                              |                              |                             |
| N                                           | 3,367                        | 3,529                        | 3,142                       |
| Mortality events (N=327)                    | 109 (3·24)                   | 98 (2·78)                    | 120 (3·82)                  |
| Median cooked vegetable<br>intake, servings | 0·33 (0·17-<br>0·46) per day | 0·78 (0·62-<br>0·97) per day | 1·87 (1·24-2·82)<br>per day |
| Age and sex adjusted                        | 1·00                         | 0·99 (0·75-<br>1·31)         | 1·19 (0·93-1·54)            |
| Multivariable adjusted                      | 1·00                         | 0·95 (0·70-<br>1·30)         | 1·19 (0·87-1·62)            |
| <b>Africa (N=4,558)</b>                     |                              |                              |                             |
| N                                           | 1,505                        | 1,503                        | 1,550                       |
| Mortality events (N=451)                    | 154 (10·23)                  | 137 (9·12)                   | 160 (10·32)                 |
| Median cooked vegetable<br>intake, servings | 0·29 (0·17-<br>0·37) per day | 0·60 (0·52-<br>0·72) per day | 1·23 (1·00-1·65)<br>per day |
| Age and sex adjusted                        | 1·00                         | 0·82 (0·65-<br>1·03)         | 0·94 (0·74-1·20)            |
| Multivariable adjusted                      | 1·00                         | 0·82 (0·56-<br>1·21)         | 0·93 (0·64-1·36)            |
| <b>North America/Europe (N=14,916)</b>      |                              |                              |                             |
| N                                           | 4,922                        | 4,922                        | 5,072                       |
| Mortality events (n=328)                    | 135 (2·74)                   | 110 (2·23)                   | 83 (1·64)                   |
| Median cooked vegetable<br>intake, servings | 0·32 (0·21-<br>0·41) per day | 0·69 (0·59-<br>0·80) per day | 1·38 (1·12-1·83)<br>per day |
| Age and sex adjusted                        | 1·00                         | 0·82 (0·64-<br>1·06)         | 0·65 (0·49-0·86)            |
| Multivariable adjusted                      | 1·00                         | 0·90 (0·63-<br>1·29)         | 0·76 (0·50-1·18)            |
| <b>Middle East (N=11,485)</b>               |                              |                              |                             |
| N                                           | 3,792                        | 3,789                        | 3,904                       |
| Mortality events (N=208)                    | 85 (2·24)                    | 56 (1·48)                    | 67 (1·72)                   |
| Median cooked vegetable<br>intake, servings | 0·27 (0·16-<br>0·40) per day | 0·79 (0·65-<br>0·89) per day | 1·45 (1·12-1·80)<br>per day |
| Age and sex adjusted                        | 1·00                         | 0·97 (0·66-<br>1·41)         | 1·16 (0·81-1·14)            |
| Multivariable adjusted                      | 1·00                         | 0·95 (0·64-<br>1·41)         | 1·16 (0·74-1·82)            |
| <b>South America (N=22,626)</b>             |                              |                              |                             |
| N                                           | 5,705                        | 4,489                        | 12,432                      |
| Mortality events (n=799)                    | 279 (4·89)                   | 182 (4·05)                   | 338 (2·72)                  |
| Median cooked vegetable                     | 0·32 (0·21-                  | 0·69 (0·59-                  | 1·38 (1·12-1·83)            |

| intake, servings       | 0·41) per day | 0·80) per day    | per day          |
|------------------------|---------------|------------------|------------------|
| Age and sex adjusted   | 1·00          | 1·00 (0·81-1·14) | 0·92 (0·77-1·11) |
| Multivariable adjusted | 1·00          | 1·04 (0·87-1·24) | 1·07 (0·88-1·31) |

Age and sex adjusted: adjusted for age, sex, center (random effect), multivariable adjusted: adjusted for age, sex, center (random effect), energy intake, current smoker, diabetes, urban/rural location, physical activity, education level, tertiles of white meat, red meat, breads and cereals and fruit intake. P for heterogeneity=0·0364.

Table S15: Association of total fruit, vegetable, and legume intake with total mortality by region using overall tertiles.

| <b>All participants<br/>(N=135,335)</b>               | <b>T1</b>     | <b>T2</b>            | <b>T3</b>        |
|-------------------------------------------------------|---------------|----------------------|------------------|
| Fruit, vegetable and legume intake cutpoint, servings | <2·50 per day | 2·50 to 4·09 per day | >4·09 per day    |
| <b>South Asia (N=29,560)</b>                          |               |                      |                  |
| N                                                     | 16,091        | 7,690                | 5,779            |
| Mortality events (N=2,527)                            | 1713 (10·65)  | 520 (6·76)           | 294 (5·09)       |
| Age and sex adjusted                                  | 1·00          | 0·71 (0·64-0·79)     | 0·60 (0·53-0·68) |
| Multivariable adjusted                                | 1·00          | 0·78 (0·69-0·87)     | 0·70 (0·60-0·82) |
| <b>China (N=42,152)</b>                               |               |                      |                  |
| N                                                     | 13,662        | 22,706               | 5,784            |
| Mortality events (N=1,156)                            | 522 (3·82)    | 530 (2·33)           | 104 (1·80)       |
| Age and sex adjusted                                  | 1·00          | 0·72 (0·63-0·82)     | 0·57 (0·46-0·72) |
| Multivariable adjusted                                | 1·00          | 0·92 (0·80-1·06)     | 0·90 (0·71-1·15) |
| <b>Southeast Asia (N=10,038)</b>                      |               |                      |                  |
| N                                                     | 4,695         | 2,131                | 3,212            |
| Mortality events (N=327)                              | 141 (3·00)    | 78 (3·66)            | 108 (3·36)       |
| Age and sex adjusted                                  | 1·00          | 1·30 (0·99-1·72)     | 1·12 (0·87-1·44) |
| Multivariable adjusted                                | 1·00          | 1·22 (0·85-1·77)     | 1·26 (0·89-1·77) |
| <b>Africa (N=4,558)</b>                               |               |                      |                  |
| N                                                     | 2,555         | 856                  | 1,147            |
| Mortality events (N=451)                              | 249 (9·75)    | 65 (7·59)            | 137 (11·94)      |
| Age and sex adjusted                                  | 1·00          | 0·99 (0·73-1·34)     | 0·92 (0·68-1·26) |
| Multivariable adjusted                                | 1·00          | 0·90 (0·53-1·53)     | 0·78 (0·43-1·40) |
| <b>North America/Europe (N=14,916)</b>                |               |                      |                  |
| N                                                     | 1,969         | 3,382                | 9,565            |
| Mortality events (n=328)                              | 63 (3·20)     | 75 (2·22)            | 190 (1·99)       |
| Age and sex adjusted                                  | 1·00          | 0·68 (0·49-0·95)     | 0·66 (0·49-0·88) |
| Multivariable adjusted                                | 1·00          | 0·89 (0·62-1·27)     | 0·95 (0·68-1·33) |
| <b>Middle East (N=11,485)</b>                         |               |                      |                  |
| N                                                     | 960           | 2,777                | 7,748            |
| Mortality events (N=208)                              | 20 (2·08)     | 54 (1·94)            | 134 (1·73)       |
| Age and sex adjusted                                  | 1·00          | 1·03 (0·61-1·72)     | 0·86 (0·54-1·39) |
| Multivariable adjusted                                | 1·00          | 1·12 (0·65-1·95)     | 0·96 (0·55-1·67) |
| <b>South America (N=22,626)</b>                       |               |                      |                  |



|                          |            |                  |                  |
|--------------------------|------------|------------------|------------------|
| N                        | 4,726      | 5,119            | 12,778           |
| Mortality events (n=799) | 214 (4.53) | 215 (4.20)       | 370 (2.90)       |
| Age and sex adjusted     | 1.00       | 0.94 (0.77-1.13) | 0.83 (0.69-1.00) |
| Multivariable adjusted   | 1.00       | 1.00 (0.82-1.22) | 0.94 (0.76-1.15) |

Age and sex adjusted: adjusted for age, sex, center (random effect), multivariable adjusted: adjusted for age, sex, center (random effect), energy intake, current smoker, diabetes, urban/rural location, physical activity, education level, tertiles of white meat, red meat, breads and cereals intake.

Table S16: Association of total fruit intake with total mortality by region using overall tertiles.

| <b>All participants<br/>(N=135,335)</b> | <b>T1</b>     | <b>T2</b>               | <b>T3</b>        |
|-----------------------------------------|---------------|-------------------------|------------------|
| Fruit intake cutpoint,<br>servings      | <0·53 per day | 0·53 to 1·50 per<br>day | >1·50 per day    |
| <b>South Asia (N=29,560)</b>            |               |                         |                  |
| N                                       | 17,903        | 7,872                   | 3,785            |
| Mortality events<br>(N=2,527)           | 1866 (10·42)  | 496 (6·30)              | 165 (4·36)       |
| Age and sex adjusted                    | 1·00          | 0·73 (0·66-<br>0·81)    | 0·52 (0·44-0·62) |
| Multivariable adjusted                  | 1·00          | 0·86 (0·77-<br>0·97)    | 0·70 (0·58-0·85) |
| <b>China (N=42,152)</b>                 |               |                         |                  |
| N                                       | 17,245        | 16,560                  | 8,347            |
| Mortality events<br>(N=1,156)           | 622 (3·61)    | 384 (2·32)              | 150 (1·80)       |
| Age and sex adjusted                    | 1·00          | 0·73 (0·64-<br>0·84)    | 0·58 (0·48-0·70) |
| Multivariable adjusted                  | 1·00          | 0·91 (0·79-<br>1·04)    | 0·79 (0·64-0·97) |
| <b>Southeast Asia (N=10,038)</b>        |               |                         |                  |
| N                                       | 2,292         | 4,241                   | 3,505            |
| Mortality events (N=327)                | 82 (3·58)     | 129 (3·04)              | 116 (3·31)       |
| Age and sex adjusted                    | 1·00          | 0·89 (0·67-<br>1·19)    | 0·96 (0·71-1·29) |
| Multivariable adjusted                  | 1·00          | 0·99 (0·73-<br>1·34)    | 1·07 (0·75-1·52) |
| <b>Africa (N=4,558)</b>                 |               |                         |                  |
| N                                       | 1,751         | 1,247                   | 1,560            |
| Mortality events (N=451)                | 168 (9·59)    | 115 (9·22)              | 168 (10·77)      |
| Age and sex adjusted                    | 1·00          | 1·18 (0·91-<br>1·52)    | 0·91 (0·67-1·24) |
| Multivariable adjusted                  | 1·00          | 1·11 (0·70-<br>1·78)    | 0·82 (0·50-1·34) |
| <b>North America/Europe (N=14,916)</b>  |               |                         |                  |
| N                                       | 1,602         | 4,920                   | 8,394            |
| Mortality events (n=328)                | 38 (2·37)     | 121 (2·46)              | 169 (2·01)       |
| Age and sex adjusted                    | 1·00          | 0·90 (0·62-<br>1·30)    | 0·74 (0·52-1·05) |
| Multivariable adjusted                  | 1·00          | 1·06 (0·72-<br>1·56)    | 1·05 (0·70-1·56) |
| <b>Middle East (N=11,485)</b>           |               |                         |                  |
| N                                       | 298           | 2,145                   | 9,042            |
| Mortality events (N=208)                | 9 (3·02)      | 42 (1·96)               | 157 (1·74)       |
| Age and sex adjusted                    | 1·00          | 0·86 (0·41-<br>1·80)    | 0·66 (0·33-1·33) |
| Multivariable adjusted                  | 1·00          | 0·98 (0·45-<br>2·14)    | 0·76 (0·34-1·63) |
| <b>South America (N=22,626)</b>         |               |                         |                  |
| N                                       | 3,571         | 7,674                   | 11,381           |

|                          |            |                  |                  |
|--------------------------|------------|------------------|------------------|
| Mortality events (n=799) | 140 (3·92) | 269 (3·51)       | 390 (3·43)       |
| Age and sex adjusted     | 1·00       | 0·89 (0·72-1·09) | 0·75 (0·62-0·92) |
| Multivariable adjusted   | 1·00       | 0·92 (0·75-1·14) | 0·84 (0·68-1·05) |

Age and sex adjusted: adjusted for age, sex, center (random effect), multivariable adjusted: adjusted for age, sex, center (random effect), energy intake, current smoker, diabetes, urban/rural location, physical activity, education level, tertiles of white meat, red meat, breads and cereals and vegetable intake.

Table S17: Association of vegetable intake with total mortality by region using overall tertiles.

| <b>All participants<br/>(N=135,335)</b> | <b>T1</b>     | <b>T2</b>            | <b>T3</b>        |
|-----------------------------------------|---------------|----------------------|------------------|
| Vegetable intake cutpoint, servings     | <1.32 per day | 1.32 to 2.06 per day | >2.06 per day    |
| <b>South Asia (N=29,560)</b>            |               |                      |                  |
| N                                       | 18,574        | 5,381                | 5,605            |
| Mortality events (N=2,527)              | 1865 (10.04)  | 358 (6.65)           | 304 (5.42)       |
| Age and sex adjusted                    | 1.00          | 0.75 (0.66-0.84)     | 0.67 (0.59-0.76) |
| Multivariable adjusted                  | 1.00          | 0.85 (0.74-0.96)     | 0.82 (0.71-0.95) |
| <b>China (N=42,152)</b>                 |               |                      |                  |
| N                                       | 6,293         | 25,463               | 10,396           |
| Mortality events (N=1,156)              | 229 (3.64)    | 710 (2.79)           | 217 (2.09)       |
| Age and sex adjusted                    | 1.00          | 0.88 (0.75-1.04)     | 0.77 (0.63-0.94) |
| Multivariable adjusted                  | 1.00          | 1.11 (0.94-1.32)     | 1.04 (0.84-1.29) |
| <b>Southeast Asia (N=10,038)</b>        |               |                      |                  |
| N                                       | 5,415         | 2,371                | 2,252            |
| Mortality events (N=327)                | 164 (3.03)    | 84 (3.54)            | 79 (3.51)        |
| Age and sex adjusted                    | 1.00          | 1.21 (0.93-1.58)     | 1.16 (0.89-1.52) |
| Multivariable adjusted                  | 1.00          | 1.23 (0.90-1.69)     | 1.18 (0.86-1.62) |
| <b>Africa (N=4,558)</b>                 |               |                      |                  |
| N                                       | 3,123         | 753                  | 682              |
| Mortality events (N=451)                | 314 (10.05)   | 65 (8.63)            | 72 (10.56)       |
| Age and sex adjusted                    | 1.00          | 0.93 (0.69-1.24)     | 1.17 (0.88-1.56) |
| Multivariable adjusted                  | 1.00          | 0.91 (0.63-1.30)     | 1.39 (0.96-2.02) |
| <b>North America/Europe (N=14,916)</b>  |               |                      |                  |
| N                                       | 2,130         | 2,575                | 10,211           |
| Mortality events (n=328)                | 73 (3.43)     | 62 (2.41)            | 193 (1.89)       |
| Age and sex adjusted                    | 1.00          | 0.75 (0.54-1.05)     | 0.64 (0.48-0.85) |
| Multivariable adjusted                  | 1.00          | 0.90 (0.63-1.28)     | 0.79 (0.58-1.09) |
| <b>Middle East (N=11,485)</b>           |               |                      |                  |
| N                                       | 3,420         | 3,486                | 4,579            |
| Mortality events (N=208)                | 73 (2.13)     | 67 (1.49)            | 68 (1.49)        |
| Age and sex adjusted                    | 1.00          | 1.06 (0.75-1.49)     | 0.89 (0.62-1.28) |
| Multivariable adjusted                  | 1.00          | 1.10 (0.78-1.56)     | 0.93 (0.63-1.39) |
| <b>South America (N=22,626)</b>         |               |                      |                  |
| N                                       | 5,705         | 4,489                | 12,432           |
| Mortality events (n=799)                | 279 (4.89)    | 182 (4.05)           | 338 (2.72)       |

|                        |      |                  |                  |
|------------------------|------|------------------|------------------|
| Age and sex adjusted   | 1.00 | 0.90 (0.74-1.09) | 0.87 (0.73-1.05) |
| Multivariable adjusted | 1.00 | 0.94 (0.77-1.14) | 0.97 (0.79-1.18) |

Age and sex adjusted: adjusted for age, sex, center (random effect), multivariable adjusted: adjusted for age, sex, center (random effect), energy intake, current smoker, diabetes, urban/rural location, physical activity, education level, tertiles of white meat, red meat, breads and cereals and fruit intake.

Table S18: Association of legume intake with total mortality by region using overall tertiles.

| <b>All participants<br/>(N=135,335)</b> | <b>T1</b>     | <b>T2</b>            | <b>T3</b>         |
|-----------------------------------------|---------------|----------------------|-------------------|
| Legume intake cutpoint, servings        | <0·14 per day | 0·14 to 0·40 per day | >0·40 per day     |
| <b>South Asia (N=29,560)</b>            |               |                      |                   |
| N                                       | 2,127         | 6,100                | 21,333            |
| Mortality events (N=2,527)              | 167 (7·85)    | 562 (9·21)           | 1,798 (8·43)      |
| Age and sex adjusted                    | 1·00          | 0·91 (0·76-1·10)     | 0·74 (0·562-0·88) |
| Multivariable adjusted                  | 1·00          | 0·96 (0·80-1·16)     | 0·88 (0·73-1·07)  |
| <b>China (N=42,152)</b>                 |               |                      |                   |
| N                                       | 20,348        | 15,396               | 6,408             |
| Mortality events (N=1,156)              | 630 (3·10)    | 376 (2·44)           | 150 (2·34)        |
| Age and sex adjusted                    | 1·00          | 0·75 (0·66-0·86)     | 0·66 (0·55-0·80)  |
| Multivariable adjusted                  | 1·00          | 0·96 (0·83-1·11)     | 0·94 (0·77-1·15)  |
| <b>Southeast Asia (N=10,038)</b>        |               |                      |                   |
| N                                       | 3,267         | 3,978                | 2,793             |
| Mortality events (N=327)                | 120 (3·67)    | 114 (2·87)           | 93 (3·33)         |
| Age and sex adjusted                    | 1·00          | 0·75 (0·56-1·00)     | 0·81 (0·59-1·12)  |
| Multivariable adjusted                  | 1·00          | 0·78 (0·57-1·05)     | 0·79 (0·56-1·10)  |
| <b>Africa (N=4,558)</b>                 |               |                      |                   |
| N                                       | 3,072         | 957                  | 529               |
| Mortality events (N=451)                | 309 (10·06)   | 99 (10·34)           | 43 (8·13)         |
| Age and sex adjusted                    | 1·00          | 0·91 (0·72-1·15)     | 0·68 (0·49-0·95)  |
| Multivariable adjusted                  | 1·00          | 1·03 (0·75-1·40)     | 0·63 (0·41-0·98)  |
| <b>North America/Europe (N=14,916)</b>  |               |                      |                   |
| N                                       | 6,040         | 6,032                | 2,844             |
| Mortality events (n=328)                | 146 (2·42)    | 129 (2·14)           | 53 (1·86)         |
| Age and sex adjusted                    | 1·00          | 0·78 (0·62-0·99)     | 0·75 (0·55-1·03)  |
| Multivariable adjusted                  | 1·00          | 0·84 (0·65-1·08)     | 0·91 (0·65-1·28)  |
| <b>Middle East (N=11,485)</b>           |               |                      |                   |
| N                                       | 1,551         | 4,834                | 5,100             |
| Mortality events (N=208)                | 29 (1·87)     | 81 (1·68)            | 98 (1·92)         |
| Age and sex adjusted                    | 1·00          | 0·81 (0·53-1·25)     | 0·94 (0·61-1·45)  |
| Multivariable adjusted                  | 1·00          | 1·87 (0·56-1·36)     | 0·96 (0·60-1·55)  |
| <b>South America (N=22,626)</b>         |               |                      |                   |
| N                                       | 8,251         | 7,368                | 7,007             |
| Mortality events (n=799)                | 360 (4·36)    | 279 (3·79)           | 160 (2·28)        |

|                        |      |                  |                  |
|------------------------|------|------------------|------------------|
| Age and sex adjusted   | 1·00 | 1·07 (0·90-1·27) | 0·97 (0·77-1·21) |
| Multivariable adjusted | 1·00 | 1·11 (0·93-1·33) | 1·08 (0·85-1·36) |

Age and sex adjusted: adjusted for age, sex, center (random effect), multivariable adjusted: adjusted for age, sex, center (random effect), energy intake, current smoker, diabetes, urban/rural location, physical activity, education level, tertiles of white meat, red meat, breads and cereals intake.

**Supplementary Methods: Association of raw and cooked vegetables and major CVD and mortality including China.**

We conducted a sensitivity analysis on raw and cooked vegetable intake and major CVD and mortality with China included whereby we assumed that total vegetable intake was consumed as cooked vegetables. This sensitivity analysis includes the 42,152 participants from China.

Table S19A: Association of raw vegetable intake with major cardiovascular disease and mortality.

| <b>All participants<br/>(N=93,183)</b> | <b>&lt;1/month<br/>(N=66,206)</b> | <b>1/month to<br/>&lt;1/week<br/>(N=9,086)</b> | <b>1 to &lt;3/week<br/>(N=15,410)</b> | <b>3/week to<br/>&lt;1/day<br/>(N=16,263)</b> | <b>1 to 2/day<br/>(N=15,818)</b> | <b>&gt;2/day<br/>(N=12,552)</b> | <b>P-trend</b> |
|----------------------------------------|-----------------------------------|------------------------------------------------|---------------------------------------|-----------------------------------------------|----------------------------------|---------------------------------|----------------|
| Median raw vegetable intake, servings  | 0.00 (0.00-0.00) per day          | 0.080 (0.051-0.11) per day                     | 0.25 (0.20-0.33) per day              | 0.67 (0.52-0.82) per day                      | 1.42 (1.19-1.66) per day         | 2.82 (2.35-3.61) per day        |                |
| <b>Major CVD</b>                       |                                   |                                                |                                       |                                               |                                  |                                 |                |
| Major CVD events (N=4,784)             | 2,846 (4.30)                      | 313 (3.44)                                     | 459 (2.98)                            | 477 (2.93)                                    | 422 (2.67)                       | 267 (2.13)                      |                |
| Multivariable adjusted                 | 1.00                              | 0.99 (0.85-1.16)                               | 0.89 (0.76-1.04)                      | 0.96 (0.81-1.14)                              | 0.96 (0.79-1.16)                 | 0.82 (0.65-1.02)                | 0.1803         |
| <b>Mortality</b>                       |                                   |                                                |                                       |                                               |                                  |                                 |                |
| Mortality events (N=4,640)             | 2,329 (9.68)                      | 480 (5.28)                                     | 670 (4.35)                            | 536 (3.30)                                    | 396 (2.50)                       | 229 (1.82)                      |                |
| Multivariable adjusted                 | 1.00                              | 0.93 (0.82-1.05)                               | 0.85 (0.74-0.97)                      | 0.85 (0.73-0.99)                              | 0.92 (0.77-1.09)                 | 0.79 (0.64-0.98)                | 0.0451         |

Major CVD: defined as death from cardiovascular causes and nonfatal myocardial infarction, stroke, and heart failure. Adjusted for age, sex, center (random effect), energy intake, current smoker, diabetes, urban/rural location, physical activity, education level, tertiles of white meat, red meat, breads and cereals, and fruit intake. Assumes total vegetable intake was consumed cooked in China (N=42,152) and does not exclude the participants from this region. P for heterogeneity=0.60 with cooked vegetable intake for major CVD and P for heterogeneity=0.35 with cooked vegetable intake for total mortality.



Table S19B: Association of cooked vegetable intake with major cardiovascular disease and mortality.

| <b>All participants<br/>(N=93,183)</b>   | <b>&lt;3/week<br/>(N=24,147)</b> | <b>3/week to<br/>&lt;1/day<br/>(N=35,327)</b> | <b>1 to 2/day<br/>(N=31,567)</b> | <b>&gt;2/day<br/>(N=44,294)</b> | <b>P-trend</b> |
|------------------------------------------|----------------------------------|-----------------------------------------------|----------------------------------|---------------------------------|----------------|
| Median cooked vegetable intake, servings | 0.24 (0.13-0.34)<br>per day      | 0.68 (0.55-0.83)<br>per day                   | 1.40 (1.18-1.62)<br>per day      | 2.06 (2.01-2.23)<br>per day     |                |
| <b>Major CVD</b>                         |                                  |                                               |                                  |                                 |                |
| Major CVD events (N=4,784)               | 833 (3.45)                       | 1,146 (3.24)                                  | 1,069 (3.39)                     | 1,736 (3.92)                    |                |
| Multivariable adjusted                   | 1.00                             | 1.08 (0.97-1.19)                              | 1.06 (0.96-1.19)                 | 1.18 (1.05-1.32)                | 0.0855         |
| <b>Mortality</b>                         |                                  |                                               |                                  |                                 |                |
| Mortality events (N=4,640)               | 661 (1.93)                       | 610 (1.85)                                    | 595 (1.28)                       | 277 (1.28)                      |                |
| Multivariable adjusted                   | 1.00                             | 1.02 (0.94-1.10)                              | 0.90 (0.82-0.99)                 | 0.96 (0.86-1.06)                | 0.1020         |

Major CVD: defined as death from cardiovascular causes and nonfatal myocardial infarction, stroke, and heart failure. Adjusted for age, sex, center (random effect), energy intake, current smoker, diabetes, urban/rural location, physical activity, education level, tertiles of white meat, red meat, breads and cereals, and fruit intake. Assumes total vegetable intake was consumed cooked in China (N=42,152) and does not exclude the participants from this region. P for heterogeneity=0.60 with raw vegetable intake for major CVD and P for heterogeneity=0.35 with raw vegetable intake for total mortality.

**Supplementary Methods: Association of fruits, vegetables and legumes adjusting for waist-to-hip ratio, hypertension status and cholesterol medication use.**

Table S20: Association of total fruit, vegetable and legume intake with cardiovascular disease and mortality.

| <b>All participants (N=135,335)</b>                 | <b>&lt;1/day (N=9,082)</b> | <b>1 to &lt;2/day (N=19,036)</b> | <b>2 to &lt;3/day (N=35,128)</b> | <b>3 to &lt;4/day (N=24,485)</b> | <b>4 to &lt;5/day (N=14,849)</b> | <b>5 to &lt;6/day (N=9,790)</b> | <b>6 to 7/day (N=6,945)</b> | <b>7 to 8/day (N=4,857)</b> | <b>&gt;8/day (N=11,163)</b> | <b>P-trend</b> |
|-----------------------------------------------------|----------------------------|----------------------------------|----------------------------------|----------------------------------|----------------------------------|---------------------------------|-----------------------------|-----------------------------|-----------------------------|----------------|
| Median fruit, vegetable and legume intake, servings | 0.64 (0.41-0.83) per day   | 1.56 (1.30-1.79) per day         | 2.52 (2.29-2.75) per day         | 3.43 (3.21-3.70) per day         | 4.43 (4.19-4.70) per day         | 5.46 (5.22-5.72) per day        | 6.45 (6.22-6.71) per day    | 7.46 (7.22-7.71) per day    | 9.99 (8.82-12.15) per day   |                |
| <b>Major CVD</b>                                    |                            |                                  |                                  |                                  |                                  |                                 |                             |                             |                             |                |
| Major CVD events (N=4,784)                          | 373 (4.11)                 | 743 (3.90)                       | 1391 (3.96)                      | 882 (3.60)                       | 534 (3.60)                       | 267 (2.73)                      | 180 (2.459)                 | 131 (2.70)                  | 283(2.54)                   |                |
| Multivariable adjusted                              | 1.00                       | 1.03 (0.89-1.20)                 | 1.07 (0.93-1.24)                 | 1.04 (0.90-1.21)                 | 1.19 (1.01-1.40)                 | 0.94 (0.78-1.14)                | 0.93 (0.75-1.15)            | 0.97 (0.79-1.26)            | 0.90 (0.73-1.10)            | 0.1543         |
| <b>MI</b>                                           |                            |                                  |                                  |                                  |                                  |                                 |                             |                             |                             |                |
| MI events (N=2,143)                                 | 164 (1.81)                 | 391 (2.05)                       | 565 (1.61)                       | 375 (1.53)                       | 254 (1.71)                       | 114 (1.16)                      | 77 (1.11)                   | 60 (1.24)                   | 143 (1.28)                  |                |
| Multivariable adjusted                              | 1.00                       | 1.04 (0.84-1.28)                 | 1.14 (0.93-1.40)                 | 1.15 (0.92-1.43)                 | 1.27 (1.00-1.61)                 | 0.86 (0.65-1.14)                | 0.84 (0.62-1.15)            | 0.96 (0.68-1.35)            | 0.98 (0.73-1.31)            | 0.2440         |
| <b>Stroke</b>                                       |                            |                                  |                                  |                                  |                                  |                                 |                             |                             |                             |                |
| Stroke events (N=2,234)                             | 157 (1.73)                 | 283 (1.49)                       | 727 (2.07)                       | 463 (1.89)                       | 233 (1.57)                       | 127 (1.30)                      | 81 (1.17)                   | 59 (1.21)                   | 104 (0.93)                  |                |
| Multivariable adjusted                              | 1.00                       | 1.04 (0.83-1.30)                 | 1.03 (0.83-1.27)                 | 1.02 (0.81-1.27)                 | 1.16 (0.91-1.48)                 | 1.10 (0.83-1.46)                | 1.11 (0.81-1.52)            | 1.22 (0.85-1.73)            | 0.92 (0.67-1.28)            | 0.6652         |
| <b>CV mortality</b>                                 |                            |                                  |                                  |                                  |                                  |                                 |                             |                             |                             |                |
| CV mortality events (N=1,649)                       | 215 (2.37)                 | 361 (1.90)                       | 418 (1.19)                       | 245 (1.00)                       | 161 (1.08)                       | 68 (0.69)                       | 57 (0.82)                   | 43 (0.89)                   | 81 (0.73)                   |                |
| Multivariable adjusted                              | 1.00                       | 0.84 (0.68-1.04)                 | 0.85 (0.69-1.05)                 | 0.78 (0.62-0.99)                 | 0.90 (0.69-1.17)                 | 0.58 (0.42-0.81)                | 0.82 (0.58-1.16)            | 0.87 (0.58-1.29)            | 0.67 (0.46-0.95)            | 0.0565         |
| <b>Non-CV mortality</b>                             |                            |                                  |                                  |                                  |                                  |                                 |                             |                             |                             |                |
| Non-CV mortality events (N=3,809)                   | 486 (5.35)                 | 918 (4.82)                       | 1,023 (2.91)                     | 485 (1.98)                       | 284 (1.91)                       | 199 (2.03)                      | 130 (2.03)                  | 80 (1.65)                   | 204 (1.83)                  |                |
| Multivariable adjusted                              | 1.00                       | 1.05 (0.92-1.19)                 | 0.90 (0.79-1.03)                 | 0.74 (0.63-0.92)                 | 0.77 (0.64-0.92)                 | 0.86 (0.70-1.05)                | 0.81 (0.64-1.03)            | 0.78 (0.59-1.03)            | 0.79 (0.63-0.99)            | 0.0007         |
| <b>Mortality</b>                                    |                            |                                  |                                  |                                  |                                  |                                 |                             |                             |                             |                |
| Mortality events                                    | 736 (810)                  | 1,371 (7.20)                     | 1,529 (4.35)                     | 772 (3.15)                       | 468 (3.15)                       | 286 (2.92)                      | 198 (2.85)                  | 131 (2.70)                  | 305 (2.73)                  |                |

|                        |      |                  |                  |                  |                  |                  |                  |                  |                  |        |
|------------------------|------|------------------|------------------|------------------|------------------|------------------|------------------|------------------|------------------|--------|
| (N=5,796)              |      |                  |                  |                  |                  |                  |                  |                  |                  |        |
| Multivariable adjusted | 1·00 | 1·01 (0·90-1·12) | 0·90 (0·80-1·00) | 0·75 (0·66-0·85) | 0·81 (0·71-0·94) | 0·78 (0·66-0·93) | 0·82 (0·68-0·99) | 0·81 (0·65-1·01) | 0·77 (0·64-0·92) | 0·0001 |

Major CVD: defined as death from cardiovascular causes and nonfatal myocardial infarction, stroke, and heart failure. MI: myocardial infarction; CV mortality: cardiovascular mortality; non-CV mortality: non-cardiovascular mortality. Crude event rates shown. Adjusted for age, sex, center (random effect), energy intake, current smoker, diabetes, urban/rural location, physical activity, education level, tertiles of white meat, red meat, breads and cereals, waist-to-hip ratio, hypertension status, and cholesterol medication use.

Table S21: Association of total fruit and vegetable intake with cardiovascular disease and mortality.

| <b>All participants (N=135,335)</b>         | <b>&lt;1/day (N=16,512)</b> | <b>1 to &lt;2/day (N=20,478)</b> | <b>2 to &lt;3/day (N=36,036)</b> | <b>3 to &lt;4/day (N=22,134)</b> | <b>4 to &lt;5/day (N=12,604)</b> | <b>5 to &lt;6/day (N=8,575)</b> | <b>6 to 7/day (N=5,841)</b> | <b>7 to 8/day (N=4,068)</b> | <b>&gt;8/day (N=9,078)</b> | <b>P-trend</b> |
|---------------------------------------------|-----------------------------|----------------------------------|----------------------------------|----------------------------------|----------------------------------|---------------------------------|-----------------------------|-----------------------------|----------------------------|----------------|
| Median fruit and vegetable intake, servings | 0.61 (0.38-0.81) per day    | 1.53 (1.27-1.77) per day         | 2.47 (2.25-2.71) per day         | 3.43 (3.20-3.70) per day         | 4.44 (4.20-4.70) per day         | 5.45 (5.22-5.72) per day        | 6.45 (6.22-6.71) per day    | 7.45 (7.22-7.71) per day    | 9.98 (8.82-12.12) per day  |                |
| <b>Major CVD</b>                            |                             |                                  |                                  |                                  |                                  |                                 |                             |                             |                            |                |
| Major CVD events (N=4,784)                  | 712 (4.31)                  | 746 (3.64)                       | 1,414 (3.92)                     | 782 (3.53)                       | 409 (3.25)                       | 234 (2.73)                      | 153 (2.62)                  | 97 (2.38)                   | 237 (2.61)                 |                |
| Multivariable adjusted                      | 1.00                        | 0.95 (0.80-1.12)                 | 1.10 (0.93-1.30)                 | 1.12 (0.92-1.35)                 | 1.05 (0.84-1.31)                 | 0.87 (0.69-1.13)                | 0.82 (0.60-1.12)            | 0.91 (0.65-1.29)            | 0.93 (0.70-1.24)           | 0.1304         |
| <b>MI</b>                                   |                             |                                  |                                  |                                  |                                  |                                 |                             |                             |                            |                |
| MI events (N=2,143)                         | 361 (2.19)                  | 396 (1.93)                       | 541 (1.50)                       | 329 (1.49)                       | 186 (1.48)                       | 104 (1.21)                      | 64 (1.10)                   | 47 (1.16)                   | 115 (1.27)                 |                |
| Multivariable adjusted                      | 1.00                        | 0.96 (0.82-1.13)                 | 1.10 (0.94-1.30)                 | 1.13 (0.94-1.36)                 | 1.07 (0.87-1.32)                 | 0.86 (0.67-1.11)                | 0.80 (0.59-1.08)            | 0.87 (0.62-1.22)            | 0.95 (0.72-1.25)           | 0.3089         |
| <b>Stroke</b>                               |                             |                                  |                                  |                                  |                                  |                                 |                             |                             |                            |                |
| Stroke events (N=2,234)                     | 283 (1.71)                  | 274 (1.34)                       | 785 (2.18)                       | 406 (1.83)                       | 176 (1.40)                       | 110 (1.28)                      | 70 (1.20)                   | 39 (0.96)                   | 91 (1.00)                  |                |
| Multivariable adjusted                      | 1.00                        | 0.83 (0.68-1.01)                 | 0.93 (0.78-1.10)                 | 0.97 (0.79-1.18)                 | 0.99 (0.75-1.28)                 | 0.98 (0.75-1.29)                | 1.03 (0.76-1.40)            | 0.78 (0.53-1.17)            | 0.89 (0.65-1.21)           | 0.8972         |
| <b>CV mortality</b>                         |                             |                                  |                                  |                                  |                                  |                                 |                             |                             |                            |                |
| CV death events (N=1,649)                   | 409 (2.48)                  | 350 (1.71)                       | 367 (1.02)                       | 195 (0.88)                       | 123 (0.98)                       | 67 (0.78)                       | 49 (0.84)                   | 23 (0.57)                   | 66 (0.73)                  |                |
| Multivariable adjusted                      | 1.00                        | 0.83 (0.70-1.00)                 | 0.81 (0.67-0.98)                 | 0.77 (0.62-0.97)                 | 0.89 (0.69-1.15)                 | 0.75 (0.55-1.02)                | 0.91 (0.64-1.29)            | 0.56 (0.34-0.92)            | 0.69 (0.48-1.00)           | 0.0567         |
| <b>Non-CV mortality</b>                     |                             |                                  |                                  |                                  |                                  |                                 |                             |                             |                            |                |
| Non-CV death events (N=3,809)               | 1,044 (6.32)                | 772 (3.77)                       | 875 (2.43)                       | 384 (1.73)                       | 236 (1.87)                       | 157 (1.83)                      | 100 (1.71)                  | 66 (1.62)                   | 175 (1.93)                 |                |
| Multivariable adjusted                      | 1.00                        | 0.90 (0.80-1.00)                 | 0.81 (0.72-0.92)                 | 0.67 (0.58-0.78)                 | 0.79 (0.66-0.94)                 | 0.77 (0.63-0.95)                | 0.74 (0.57-0.94)            | 0.71 (0.53-0.95)            | 0.78 (0.62-0.99)           | 0.0030         |
| <b>Mortality</b>                            |                             |                                  |                                  |                                  |                                  |                                 |                             |                             |                            |                |
| Mortality events (N=5,796)                  | 1,547 (9.37)                | 1,195 (5.84)                     | 1,313 (3.64)                     | 614 (2.77)                       | 380 (3.01)                       | 235 (2.74)                      | 159 (2.72)                  | 96 (2.36)                   | 257 (2.83)                 |                |
| Multivariable adjusted                      | 1.00                        | 0.87 (0.80-0.96)                 | 0.81 (0.73-0.89)                 | 0.70 (0.62-0.79)                 | 0.81 (0.71-0.94)                 | 0.75 (0.63-0.88)                | 0.78 (0.64-0.95)            | 0.67 (0.52-0.85)            | 0.76 (0.63-0.91)           | 0.0002         |

Major CVD: defined as death from cardiovascular causes and nonfatal myocardial infarction, stroke, and heart failure. MI: myocardial infarction; CV mortality: cardiovascular mortality; non-CV mortality: non-cardiovascular mortality. Crude event rates shown. Adjusted for age, sex, center (random effect), energy intake, current smoker, diabetes, urban/rural location, physical activity, education level, tertiles of white meat, red meat, breads and cereals, waist-to-hip ratio, hypertension status, and cholesterol medication use.

Table S22: Association of total fruit intake with cardiovascular disease and mortality.

| <b>All participants<br/>(N=135,335)</b> | <b>&lt;3/week<br/>(N=37,849)</b> | <b>3/week to<br/>&lt;1/day<br/>(N=31,929)</b> | <b>1 to &lt;2/day<br/>(N=32,850)</b> | <b>2 to &lt;3/day<br/>(N=14,706)</b> | <b>&gt;3/day<br/>(N=18,001)</b> | <b>P-trend</b> |
|-----------------------------------------|----------------------------------|-----------------------------------------------|--------------------------------------|--------------------------------------|---------------------------------|----------------|
| Median fruit intake, servings           | 0.20 (0.08-0.31) per day         | 0.68 (0.55-0.83) per day                      | 1.41 (1.19-1.68) per day             | 2.41 (2.19-2.66) per day             | 4.28 (3.52-5.81) per day        |                |
| <b>Major CVD</b>                        |                                  |                                               |                                      |                                      |                                 |                |
| Major CVD events (N=4,784)              | 1,646 (4.35)                     | 1,160 (3.63)                                  | 1,034 (3.15)                         | 419 (2.85)                           | 525 (2.92)                      |                |
| Multivariable adjusted                  | 1.00                             | 0.98 (0.90-1.07)                              | 0.95 (0.86-1.04)                     | 0.98 (0.86-1.12)                     | 0.89 (0.77-1.02)                | 0.1384         |
| <b>MI</b>                               |                                  |                                               |                                      |                                      |                                 |                |
| MI events (N=2,143)                     | 766 (2.02)                       | 507 (1.59)                                    | 439 (1.34)                           | 203 (1.38)                           | 228 (1.27)                      |                |
| Multivariable adjusted                  | 1.00                             | 1.06 (0.93-1.21)                              | 0.98 (0.85-1.15)                     | 1.13 (0.93-1.37)                     | 0.91 (0.74-1.13)                | 0.7148         |
| <b>Stroke</b>                           |                                  |                                               |                                      |                                      |                                 |                |
| Stroke events (N=2,234)                 | 759 (2.01)                       | 571 (1.79)                                    | 499 (1.52)                           | 174 (1.18)                           | 231 (1.28)                      |                |
| Multivariable adjusted                  | 1.00                             | 0.90 (0.80-1.02)                              | 0.93 (0.81-1.06)                     | 0.89 (0.74-1.08)                     | 0.93 (0.76-1.14)                | 0.3568         |
| <b>CV mortality</b>                     |                                  |                                               |                                      |                                      |                                 |                |
| CV death events (N=1,649)               | 703 (1.87)                       | 385 (1.21)                                    | 299 (0.91)                           | 110 (0.75)                           | 152 (0.84)                      |                |
| Multivariable adjusted                  | 1.00                             | 1.02 (0.88-1.19)                              | 0.85 (0.71-1.02)                     | 0.89 (0.69-1.15)                     | 0.84 (0.65-1.08)                | 0.0841         |
| <b>Non-CV mortality</b>                 |                                  |                                               |                                      |                                      |                                 |                |
| Non-CV death events (N=3,809)           | 1,769 (4.67)                     | 782 (2.45)                                    | 629 (1.91)                           | 264 (1.80)                           | 365 (2.03)                      |                |
| Multivariable adjusted                  | 1.00                             | 0.86 (0.78-0.96)                              | 0.76 (0.68-0.86)                     | 0.78 (0.67-0.92)                     | 0.82 (0.70-0.97)                | 0.0005         |
| <b>Mortality</b>                        |                                  |                                               |                                      |                                      |                                 |                |
| Mortality events (N=5,796)              | 2,626 (6.94)                     | 1,241 (3.89)                                  | 982 (2.99)                           | 400 (2.72)                           | 547 (3.04)                      |                |
| Multivariable adjusted                  | 1.00                             | 0.91 (0.84-0.99)                              | 0.78 (0.71-0.86)                     | 0.82 (0.72-0.93)                     | 0.82 (0.71-0.94)                | <0.0001        |

Major CVD: defined as death from cardiovascular causes and nonfatal myocardial infarction, stroke, and heart failure. MI: myocardial infarction; CV mortality: cardiovascular mortality; non-CV mortality: non-cardiovascular mortality. Crude event rates shown. Adjusted for age, sex, center (random effect), energy intake, current smoker, diabetes, urban/rural location, physical activity, education level, tertiles of white meat, red meat, breads and cereals, vegetable intake, waist-to-hip ratio, hypertension status, and cholesterol medication use.

Table S23: Association of total vegetable intake with cardiovascular disease and mortality.

| <b>All participants<br/>(N=135,335)</b> | <b>&lt;1/day<br/>(N=34,221)</b> | <b>1 to &lt;2/day<br/>(N=32,976)</b> | <b>2 to &lt;3/day<br/>(N=46,489)</b> | <b>&gt;3/day<br/>(N=21,649)</b> | <b>P-trend</b> |
|-----------------------------------------|---------------------------------|--------------------------------------|--------------------------------------|---------------------------------|----------------|
| Median vegetable intake, servings       | 0.55 (0.31-0.78)<br>per day     | 1.53 (1.25-1.70)<br>per day          | 2.06 (2.01-2.23)<br>per day          | 4.13 (3.48-5.31)<br>per day     |                |
| <b>Major CVD</b>                        |                                 |                                      |                                      |                                 |                |
| Major CVD events (N=4,784)              | 1,304 (3.81)                    | 1,172 (3.55)                         | 1,763 (3.79)                         | 545 (2.52)                      |                |
| Multivariable adjusted                  | 1.00                            | 0.99 (0.90-1.09)                     | 1.11 (1.00-1.22)                     | 0.95 (0.83-1.08)                | 0.5803         |
| <b>MI</b>                               |                                 |                                      |                                      |                                 |                |
| MI events (N=2,143)                     | 661 (1.93)                      | 610 (1.85)                           | 595 (1.28)                           | 277 (1.28)                      |                |
| Multivariable adjusted                  | 1.00                            | 1.06 (0.92-1.21)                     | 1.10 (0.95-1.28)                     | 0.91 (0.76-1.09)                | 0.7114         |
| <b>Stroke</b>                           |                                 |                                      |                                      |                                 |                |
| Stroke events (N=2,234)                 | 497 (1.45)                      | 447 (1.36)                           | 1,074 (2.31)                         | 216 (1.00)                      |                |
| Multivariable adjusted                  | 1.00                            | 0.97 (0.83-1.12)                     | 1.12 (0.97-1.30)                     | 1.09 (0.88-1.35)                | 0.0853         |
| <b>CV mortality</b>                     |                                 |                                      |                                      |                                 |                |
| CV death events (N=1,649)               | 680 (1.99)                      | 440 (1.33)                           | 364 (0.78)                           | 165 (0.76)                      |                |
| Multivariable adjusted                  | 1.00                            | 0.88 (0.76-1.02)                     | 0.96 (0.80-1.14)                     | 0.87 (0.69-1.08)                | 0.2898         |
| <b>Non-CV mortality</b>                 |                                 |                                      |                                      |                                 |                |
| Non-CV death events (N=3,809)           | 1,634 (4.77)                    | 939 (2.85)                           | 863 (1.86)                           | 373 (1.72)                      |                |
| Multivariable adjusted                  | 1.00                            | 0.90 (0.81-0.99)                     | 0.89 (0.79-1.00)                     | 0.94 (0.80-1.18)                | 0.1414         |
| <b>Mortality</b>                        |                                 |                                      |                                      |                                 |                |
| Mortality events (N=5,796)              | 2,462 (7.19)                    | 1,457 (4.42)                         | 1,303 (2.80)                         | 574 (2.65)                      |                |
| Multivariable adjusted                  | 1.00                            | 0.88 (0.81-0.96)                     | 0.91 (0.83-1.00)                     | 0.91 (0.81-1.03)                | 0.0711         |

Major CVD: defined as death from cardiovascular causes and nonfatal myocardial infarction, stroke, and heart failure. MI: myocardial infarction; CV mortality: cardiovascular mortality; non-CV mortality: non-cardiovascular mortality. Crude event rates shown. Adjusted for age, sex, center (random effect), energy intake,



current smoker, diabetes, urban/rural location, physical activity, education level, tertiles of white meat, red meat, breads and cereals, fruit intake, waist-to-hip ratio, hypertension status, and cholesterol medication use.

Table S24: Association of legume intake with cardiovascular disease and mortality.

| <b>All participants<br/>(N=135,335)</b> | <b>&lt;1/month<br/>(N=37,849)</b> | <b>1/week to<br/>&lt;1/week<br/>(N=24,487)</b> | <b>1 to &lt;3/week<br/>(N=48,426)</b> | <b>3/week to<br/>&lt;1/day<br/>(N=29,194)</b> | <b>&gt;1/day<br/>(N=13,060)</b> | <b>P-trend</b> |
|-----------------------------------------|-----------------------------------|------------------------------------------------|---------------------------------------|-----------------------------------------------|---------------------------------|----------------|
| Median legume intake, servings          | 0·00 (0·00-0·009) per day         | 0·087 (0·065-0·11) per day                     | 0·26 (0·19-0·33) per day              | 0·61 (0·52-0·75) per day                      | 1·42 (1·14-1·59) per day        |                |
| <b>Major CVD</b>                        |                                   |                                                |                                       |                                               |                                 |                |
| Major CVD events (N=4,784)              | 645 (3·99)                        | 1,022 (3·59)                                   | 1,622 (3·35)                          | 1,071 (3·67)                                  | 424 (3·25)                      |                |
| Multivariable adjusted                  | 1·00                              | 0·88 (0·78-0·98)                               | 0·84 (0·75-0·94)                      | 0·90 (0·79-1·03)                              | 0·81 (0·68-0·95)                | 0·0585         |
| <b>MI</b>                               |                                   |                                                |                                       |                                               |                                 |                |
| MI events (N=2,143)                     | 216 (1·34)                        | 402 (1·41)                                     | 713 (1·47)                            | 572 (1·96)                                    | 240 (1·84)                      |                |
| Multivariable adjusted                  | 1·00                              | 0·98 (0·81-1·19)                               | 0·90 (0·75-1·09)                      | 0·92 (0·75-1·14)                              | 0·83 (0·64-1·07)                | 0·1470         |
| <b>Stroke</b>                           |                                   |                                                |                                       |                                               |                                 |                |
| Stroke events (N=2,234)                 | 353 (2·18)                        | 538 (1·89)                                     | 764 (1·58)                            | 414 (1·42)                                    | 165 (1·26)                      |                |
| Multivariable adjusted                  | 1·00                              | 0·80 (0·69-0·93)                               | 0·79 (0·68-0·92)                      | 0·90 (0·75-1·08)                              | 0·85 (0·66-1·09)                | 0·3624         |
| <b>CV mortality</b>                     |                                   |                                                |                                       |                                               |                                 |                |
| CV death events (N=1,649)               | 215 (1·33)                        | 278 (0·98)                                     | 499 (1·03)                            | 436 (1·49)                                    | 221 (1·69)                      |                |
| Multivariable adjusted                  | 1·00                              | 0·93 (0·74-1·17)                               | 0·84 (0·67-1·05)                      | 0·88 (0·69-1·13)                              | 0·87 (0·65-1·17)                | 0·3844         |
| <b>Non-CV mortality</b>                 |                                   |                                                |                                       |                                               |                                 |                |
| Non-CV death events (N=3,809)           | 520 (3·22)                        | 656 (2·30)                                     | 1,186 (2·45)                          | 965 (3·31)                                    | 482 (3·69)                      |                |
| Multivariable adjusted                  | 1·00                              | 0·76 (0·66-0·87)                               | 0·80 (0·70-0·91)                      | 0·78 (0·66-0·91)                              | 0·70 (0·58-0·85)                | 0·0054         |
| <b>Mortality</b>                        |                                   |                                                |                                       |                                               |                                 |                |
| Mortality events (N=5,796)              | 776 (4·80)                        | 985 (3·46)                                     | 1,778 (3·67)                          | 1,503 (5·15)                                  | 754 (5·77)                      |                |
| Multivariable adjusted                  | 1·00                              | 0·80 (0·71-0·90)                               | 0·80 (0·71-0·90)                      | 0·81 (0·71-0·902)                             | 0·75 (0·64-0·87)                | 0·0039         |

Major CVD: defined as death from cardiovascular causes and nonfatal myocardial infarction, stroke, and heart failure. MI: myocardial infarction; CV mortality: cardiovascular mortality; non-CV mortality: non-cardiovascular mortality. Crude event rates shown. Adjusted for age, sex, center (random effect), energy intake,

current smoker, diabetes, urban/rural location, physical activity, education level, tertiles of white meat, red meat, breads and cereals, waist-to-hip ratio, hypertension status, and cholesterol medication use.

Table S25: Association of raw vegetable intake with cardiovascular disease and mortality.

| <b>All participants<br/>(N=93,183)</b> | <b>&lt;1/month<br/>(N=24,054)</b> | <b>1/month to<br/>&lt;1/week<br/>(N=9,086)</b> | <b>1 to &lt;3/week<br/>(N=15,410)</b> | <b>3/week to<br/>&lt;1/day<br/>(N=16,263)</b> | <b>1 to 2/day<br/>(N=15,818)</b> | <b>&gt;2/day<br/>(N=12,552)</b> | <b>P-trend</b> |
|----------------------------------------|-----------------------------------|------------------------------------------------|---------------------------------------|-----------------------------------------------|----------------------------------|---------------------------------|----------------|
| Median raw vegetable intake, servings  | 0·00 (0·00-0·00) per day          | 0·080 (0·051-0·11) per day                     | 0·25 (0·20-0·33) per day              | 0·67 (0·52-0·82) per day                      | 1·42 (1·19-1·66) per day         | 2·82 (2·35-3·61) per day        |                |
| <b>Major CVD</b>                       |                                   |                                                |                                       |                                               |                                  |                                 |                |
| Major CVD events (N=3,085)             | 1,147 (4·77)                      | 313 (3·44)                                     | 459 (2·98)                            | 477 (2·93)                                    | 422 (2·67)                       | 267 (2·13)                      |                |
| Multivariable adjusted                 | 1·00                              | 0·94 (0·79-1·11)                               | 0·81 (0·68-0·96)                      | 0·89 (0·74-1·07)                              | 0·89 (0·73-1·09)                 | 0·78 (0·62-0·99)                | 0·1091         |
| <b>Mortality</b>                       |                                   |                                                |                                       |                                               |                                  |                                 |                |
| Mortality events (N=4,640)             | 2,329 (9·68)                      | 480 (5·28)                                     | 670 (4·35)                            | 536 (3·30)                                    | 396 (2·50)                       | 229 (1·82)                      |                |
| Multivariable adjusted                 | 1·00                              | 0·83 (0·73-0·95)                               | 0·74 (0·64-0·85)                      | 0·72 (0·61-0·85)                              | 0·76 (0·63-0·92)                 | 0·66 (0·53-0·83)                | 0·0002         |

Major CVD: defined as death from cardiovascular causes and nonfatal myocardial infarction, stroke, and heart failure. MI: myocardial infarction; CV mortality: cardiovascular mortality; non-CV mortality: non-cardiovascular mortality. Crude event rates shown. Adjusted for age, sex, center (random effect), energy intake, current smoker, diabetes, urban/rural location, physical activity, education level, tertiles of white meat, red meat, breads and cereals, fruit intake, waist-to-hip ratio, hypertension status, and cholesterol medication use.

Table S26: Association of cooked vegetable intake with cardiovascular disease and mortality.

| <b>All participants<br/>(N=93,183)</b>   | <b>&lt;3/week<br/>(N=20,890)</b> | <b>3/week to<br/>&lt;1/day<br/>(N=33,395)</b> | <b>1 to 2/day<br/>(N=25,813)</b> | <b>&gt;2/day<br/>(N=13,085)</b> | <b>P-trend</b> |
|------------------------------------------|----------------------------------|-----------------------------------------------|----------------------------------|---------------------------------|----------------|
| Median cooked vegetable intake, servings | 0.26 (0.16-0.34) per day         | 0.68 (0.55-0.83) per day                      | 1.34 (1.15-1.61) per day         | 2.66 (2.27-3.33) per day        |                |
| <b>Major CVD</b>                         |                                  |                                               |                                  |                                 |                |
| Major CVD events (N=3,085)               | 685 (3.28)                       | 1,083 (3.24)                                  | 811 (3.14)                       | 506 (3.87)                      |                |
| Multivariable adjusted                   | 1.00                             | 1.08 (0.96-1.21)                              | 1.04 (0.91-1.19)                 | 1.13 (0.97-1.32)                | 0.2366         |
| <b>Mortality</b>                         |                                  |                                               |                                  |                                 |                |
| Mortality events (N=4,640)               | 661 (1.93)                       | 610 (1.85)                                    | 595 (1.28)                       | 277 (1.28)                      |                |
| Multivariable adjusted                   | 1.00                             | 1.00 (0.91-1.09)                              | 0.85 (0.76-0.96)                 | 0.89 (0.78-1.02)                | 0.0610         |

Major CVD: defined as death from cardiovascular causes and nonfatal myocardial infarction, stroke, and heart failure. MI: myocardial infarction; CV death: cardiovascular mortality; Non-CV death: non-cardiovascular mortality. Crude event rates shown. Adjusted for age, sex, center (random effect), energy intake, current smoker, diabetes, urban/rural location, physical activity, education level, tertiles of white meat, red meat, breads and cereals, fruit intake, waist-to-hip ratio, hypertension status, and cholesterol medication use.

Table S27: Association of total fruit, vegetable and legume intake with cardiovascular disease and mortality with >6 servings/day as the highest intake category.

| <b>All participants (N=135,335)</b>                 | <b>&lt;1/day (N=9,082)</b> | <b>1 to &lt;2/day (N=19,036)</b> | <b>2 to &lt;3/day (N=35,128)</b> | <b>3 to &lt;4/day (N=24,485)</b> | <b>4 to &lt;5/day (N=14,849)</b> | <b>5 to &lt;6/day (N=9,790)</b> | <b>&gt;6/day (N=22,965)</b> | <b>P-trend</b> |
|-----------------------------------------------------|----------------------------|----------------------------------|----------------------------------|----------------------------------|----------------------------------|---------------------------------|-----------------------------|----------------|
| Median fruit, vegetable and legume intake, servings | 0.64 (0.41-0.83) per day   | 1.56 (1.30-1.79) per day         | 2.52 (2.29-2.75) per day         | 3.43 (3.21-3.70) per day         | 4.43 (4.19-4.70) per day         | 5.46 (5.22-5.72) per day        | 7.92 (6.80-9.92) per day    |                |
| <b>Major CVD</b>                                    |                            |                                  |                                  |                                  |                                  |                                 |                             |                |
| Major CVD events (N=4,784)                          | 373 (4.11)                 | 745 (3.90)                       | 1,391 (3.96)                     | 882 (3.60)                       | 534 (3.60)                       | 267 (2.73)                      | 594 (2.59)                  |                |
| Age and sex adjusted                                | 1.00                       | 1.00 (0.88-1.14)                 | 1.06 (0.94-1.20)                 | 1.00 (0.87-1.14)                 | 1.09 (0.94-1.25)                 | 0.86 (0.73-1.02)                | 0.85 (0.73-0.98)            | 0.0037         |
| Multivariable adjusted                              | 1.00                       | 1.03 (0.89-1.18)                 | 1.09 (0.96-1.25)                 | 1.06 (0.92-1.23)                 | 1.20 (1.03-1.40)                 | 0.95 (0.80-1.14)                | 0.93 (0.78-1.10)            | 0.2932         |
| <b>Mortality</b>                                    |                            |                                  |                                  |                                  |                                  |                                 |                             |                |
| Mortality events (N=5,796)                          | 736 (8.10)                 | 1,371 (7.20)                     | 1,529 (4.35)                     | 772 (3.15)                       | 468 (3.15)                       | 286 (2.92)                      | 198 (2.85)                  |                |
| Age and sex adjusted                                | 1.00                       | 0.92 (0.84-1.01)                 | 0.81 (0.74-0.89)                 | 0.65 (0.58-0.72)                 | 0.65 (0.58-0.74)                 | 0.62 (0.54-0.71)                | 0.60 (0.53-0.68)            | <0.0001        |
| Multivariable adjusted                              | 1.00                       | 1.01 (0.91-1.12)                 | 0.91 (0.82-1.01)                 | 0.78 (0.69-0.88)                 | 0.83 (0.72-0.95)                 | 0.78 (0.66-0.91)                | 0.82 (0.71-0.95)            | 0.0001         |

Major CVD: defined as death from cardiovascular causes and nonfatal myocardial infarction, stroke, and heart failure. Crude event rates shown. Age and sex adjusted: adjusted for age, sex, center (random effect), multivariable adjusted: adjusted for age, sex, center (random effect), energy intake, current smoker, diabetes, urban/rural location, physical activity, education level, tertiles of white meat, red meat, breads and cereals intake.

Table S87: Association of total fruit and vegetable intake with cardiovascular disease and mortality with >6 servings/day as the highest intake category.

| <b>All participants (N=135,335)</b>      | <b>&lt;1/day (N=16,512)</b> | <b>1 to &lt;2/day (N=20,478)</b> | <b>2 to &lt;3/day (N=36,036)</b> | <b>3 to &lt;4/day (N=22,134)</b> | <b>4 to &lt;5/day (N=12,604)</b> | <b>5 to &lt;6/day (N=8,575)</b> | <b>&gt;6/day (N=18,996)</b> | <b>P-trend</b> |
|------------------------------------------|-----------------------------|----------------------------------|----------------------------------|----------------------------------|----------------------------------|---------------------------------|-----------------------------|----------------|
| Median fruit, vegetable intake, servings | 0·64 (0·38-0·81) per day    | 1·53 (1·27-1·77) per day         | 2·27 (2·25-2·71) per day         | 3·43 (3·20-3·71) per day         | 4·44 (4·40-4·70) per day         | 5·45 (5·22-5·71) per day        | 7·88 (6·78-9·86) per day    |                |
| <b>Major CVD</b>                         |                             |                                  |                                  |                                  |                                  |                                 |                             |                |
| Major CVD events (N=4,874)               | 712 (4·31)                  | 746 (3·64)                       | 1,414 (3·92)                     | 782 (3·53)                       | 409 (3·25)                       | 234 (2·73)                      | 487 (2·56)                  |                |
| Age and sex adjusted                     | 1·00                        | 0·93 (0·84-1·04)                 | 1·02 (0·92-1·13)                 | 0·99 (0·88-1·11)                 | 0·98 (0·86-1·12)                 | 0·84 (0·71-0·98)                | 0·80 (0·70-0·98)            | 0·0018         |
| Multivariable adjusted                   | 1·00                        | 0·93 (0·83-1·05)                 | 1·04 (0·93-1·17)                 | 1·05 (0·92-1·19)                 | 1·06 (0·92-1·22)                 | 0·89 (0·75-1·06)                | 0·87 (0·74-1·02)            | 0·1910         |
| <b>Mortality</b>                         |                             |                                  |                                  |                                  |                                  |                                 |                             |                |
| Mortality events (N=5,796)               | 1,547 (9·37)                | 1,195 (5·84)                     | 1,313 (3·64)                     | 614 (2·77)                       | 380 (3·01)                       | 235 (2·74)                      | 159 (2·72)                  |                |
| Age and sex adjusted                     | 1·00                        | 0·81 (0·75-0·88)                 | 0·74 (0·68-0·81)                 | 0·60 (0·54-0·66)                 | 0·65 (0·58-0·74)                 | 0·59 (0·51-0·68)                | 0·57 (0·51-0·64)            | <0·0001        |
| Multivariable adjusted                   | 1·00                        | 0·88 (0·80-0·96)                 | 0·84 (0·76-0·93)                 | 0·73 (0·65-0·82)                 | 0·82 (0·72-0·94)                 | 0·73 (0·62-0·86)                | 0·78 (0·68-0·90)            | <0·0001        |

Major CVD: defined as death from cardiovascular causes and nonfatal myocardial infarction, stroke, and heart failure. Crude event rates shown. Age and sex adjusted: adjusted for age, sex, center (random effect), multivariable adjusted: adjusted for age, sex, center (random effect), energy intake, current smoker, diabetes, urban/rural location, physical activity, education level, tertiles of white meat, red meat, breads and cereals intake.

### Adjusted Total Mortality with Fruit Vegetable and Legume Intake

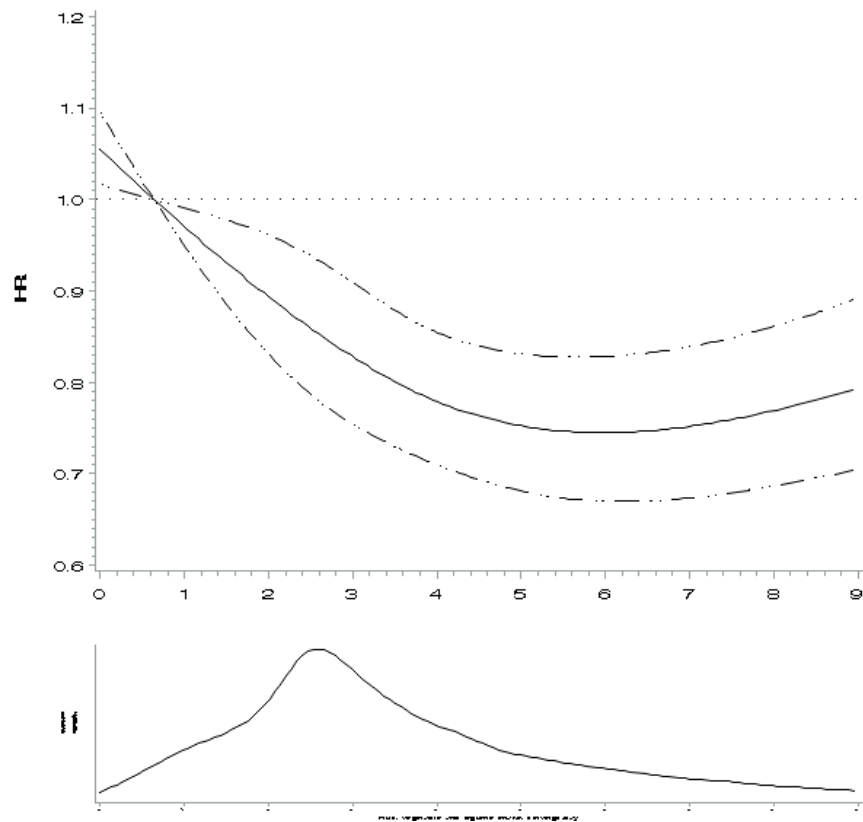

Figure S4. Total fruit, vegetable and legume intake versus mortality.

Cubic spline for the association between total fruit, vegetable and legume intake and total mortality (N=135,335). Adjusted for age, sex, center (random effect), energy intake, current smoker, diabetes, urban/rural location, physical activity, education level, tertiles of white meat, red meat, breads and cereals intake.



## References:

1. Teo K, Chow CK, Vaz M, Rangarajan S, Yusuf S, Group PI-W. The Prospective Urban Rural Epidemiology (PURE) study: examining the impact of societal influences on chronic noncommunicable diseases in low-, middle-, and high-income countries. *Am Heart J* 2009;158(1):1-7 e1.
2. MacQueen KM, McLellan E, Metzger DS, et al. What is community? An evidence-based definition for participatory public health. *Am J Public Health* 2001;91:1929-38.
3. Yusuf S, Rangarajan S, Teo K, Islam S, Liu L, et al. cardiovascular risk and events in 17 low-, middle-, and high-income countries. *N Engl J Med* 2014;371(9):818-27.
4. Tunstall-Pedoe H, Vanuzzo D, Hobbs M, Mahonen M, Cepaitis Z, Kuulasmaa K, et al. Estimation of contribution of changes in coronary care to improving survival, event rates, and coronary heart disease mortality across the WHO MONICA Project populations. *Lancet* 2000;355(9205):688-700.
5. Corsi DJ, Subramanian SV, Chow CK, McKee M, Chifamba J, Dagenais G, et al. Prospective Urban Rural Epidemiology (PURE) study: Baseline characteristics of the household sample and comparative analyses with national data in 17 countries. *Am Heart J* 2013;166(4):636-46 e4.
6. Yusuf S, Hawken S, Ounpuu S, Dans T, Avezum A, Lanas F, et al. Effect of potentially modifiable risk factors associated with myocardial infarction in 52 countries (the INTERHEART study): case-control study. *Lancet* 2004;364(9438):937-52.
7. O'Donnell MJ, Xavier D, Liu L, Zhang H, Chin SL, Rao-Melacini P, et al. Risk factors for ischaemic and intracerebral haemorrhagic stroke in 22 countries (the INTERSTROKE study): a case-control study. *Lancet* 2010;376(9735):112-23.
8. Gajalakshmi V, Peto R. Verbal autopsy of 80,000 adult deaths in Tamilnadu, South India. *BMC Public Health* 2004;4:47.
9. Jha P, Gajalakshmi V, Gupta PC, Kumar R, Mony P, Dhingra N, et al. Prospective study of one million deaths in India: rationale, design, and validation results. *PLoS Med* 2006;3(2):e18.  
Bharathi AV, Kurpad AV, Thomas T, Yusuf S, Saraswathi G, Vaz M. Development of food frequency questionnaires and a nutrient database for the Prospective Urban and Rural Epidemiological (PURE) pilot study in South India: methodological issues. *Asia Pac J Clin Nutr* 2008;17(1):178-85.
11. Dehghan M, Al HN, Yusufali A, Nusrath F, Yusuf S, Merchant AT. Development of a semi-quantitative food frequency questionnaire for use in United Arab Emirates and Kuwait based on local foods. *Nutr J* 2005;4:18.
12. Dehghan M, Al-Hamad N, McMillan CR, Prakash P, Merchant AT. Comparison of a semi-quantitative food frequency questionnaire with 24-hour dietary recalls to assess dietary intake of adult Kuwaitis. *Saudi Med J* 2009 Jan;30(1):159-61.
13. Dehghan M, Lopez-Jaramillo P, Duenas R, Anaya LL, Garcia RG, Zhang X, et al. Development and validation of a quantitative food frequency questionnaire among rural- and urban-dwelling adults in Colombia. *J Nutr Educ Behav* 2012 Nov;44(6):609-13.
14. Dehghan M, Ilow R, Zatonska K, Szuba A, Zhang X, Mente A, et al. Development, reproducibility and validity of the food frequency questionnaire in the Poland arm of the Prospective Urban and Rural Epidemiological (PURE) study. *J Hum Nutr Diet* 2012 Jun;25(3):225-32.
15. Dehghan M, del CS, Zhang X, Cuneo JM, Linetzky B, Diaz R, et al. Validation of a semi-quantitative Food Frequency Questionnaire for Argentinean adults. *PLoS One* 2012;7(5):e37958.
16. Dehghan M, Martinez S, Zhang X, Seron P, Lanas F, Islam S, et al. Relative validity of an FFQ to estimate daily food and nutrient intakes for Chilean adults. *Public Health Nutr* 2012 Sep 21;1-7.
17. Dehghan M, Mente A, Teo KK, Gao P, Sleight P, Dagenais G, et al. Relationship between healthy diet and risk of cardiovascular disease among patients on drug therapies for secondary prevention: a prospective cohort study of 31 546 high-risk individuals from 40 countries. *Circulation* 2012 Dec 4;126(23):2705-12.
18. Gunes FE, Imeryuz N, Akalin A, Bekiroglu N, Alphan E, Oguz A, et al. Development and validation of a semi-quantitative food frequency questionnaire to assess dietary intake in Turkish adults. *J Pak Med Assoc* 2015 Jul;65(7):756-63.
19. Iqbal R, Ajayan K, Bharathi AV, Zhang X, Islam S, Soman CR, et al. Refinement and validation of an FFQ developed to estimate macro- and micronutrient intakes in a south Indian population. *Public Health Nutr* 2009 Jan;12(1):12-8.
20. Mahajan R, Malik M, Bharathi AV, Lakshmi PVM, Parto BK, Rana SK, et al. Reproducibility and validity of a quantitative food frequency questionnaire in an urban and rural area of northern India. *The national medical journal of India* 2013;26(5):266-72.
21. Merchant AT, Dehghan M. Food composition database development for between country comparisons. *Nutr J* 2006;5:2.

22. Mikkelsen TB, Olsen SF, Rasmussen SE, Osler M. Relative validity of fruit and vegetable intake estimated by the food frequency questionnaire used in the Danish National Birth Cohort. *Scandinavian journal of public health*. 2007;35(2):172-9.
23. Mohammadifard N, Omidvar N, Houshiarrad A, Neyestani T, Naderi GA, Soleymani B. Validity and reproducibility of a food frequency questionnaire for assessment of fruit and vegetable intake in Iranian adults(\*). *Journal of research in medical sciences : the official journal of Isfahan University of Medical Sciences*. 2011;16(10):1286-97.
24. Landais E, Gartner A, Bour A, McCullough F, Delpuech F, Holdsworth M. Reproducibility and relative validity of a brief quantitative food frequency questionnaire for assessing fruit and vegetable intakes in North-African women. *Journal of human nutrition and dietetics : the official journal of the British Dietetic Association*. 2014;27 Suppl 2:152-9.
25. Johansson I, Hallmans G, Wikman A, Biessy C, Riboli E, Kaaks R. Validation and calibration of food-frequency questionnaire measurements in the Northern Sweden Health and Disease cohort. *Public health nutrition*. 2002;5(3):487-96.
26. Marks GC, Hughes MC, van der Pols JC. Relative validity of food intake estimates using a food frequency questionnaire is associated with sex, age, and other personal characteristics. *The Journal of nutrition*. 2006;136(2):459-65.
27. Salvini S, Hunter DJ, Sampson L, Stampfer MJ, Colditz GA, Rosner B, et al. Food-based validation of a dietary questionnaire: the effects of week-to-week variation in food consumption. *International journal of epidemiology*. 1989;18(4):858-67.
28. Merchant AT, Dehghan M. Food composition database development for between country comparisons. *Nutrition Journal*. 2006;5:2.
29. Cromwell GL, Calvert CC, Cline TR, Crenshaw JD, Crenshaw TD, Easter RA, Ewan RC, Hamilton CR, Hill GM, Lewis AJ, Mahan DC, Miller ER, Nelssen JL, Pettigrew JE, Tribble LF, Veum TL, Yen JT. Variability among sources and laboratories in nutrient analyses of corn and soybean meal. NCR-42 Committee on Swine Nutrition. North Central Regional-42. *J Anim Sci*. 1999, 77: 3262-3273.
30. Engler PP, Bowers JA. B-vitamin retention in meat during storage and preparation. A review. *J Am Diet Assoc*. 1976, 69: 253-257.
31. Nagy S, Smoot JM. Temperature and storage effects on percent retention and percent U.S. recommended dietary allowance of vitamin C in canned single-strength orange juice. *J Agric Food Chem*. 1976, 25: 135-138. 10.1021/jf60209a031.
32. Wen J, Morrissey PA, Buckley DJ, Sheehy PJ. Oxidative stability and alpha-tocopherol retention in turkey burgers during refrigerated and frozen storage as influenced by dietary alpha-tocopheryl acetate. *Br Poult Sci*. 1996, 37: 787-795.
33. Williams PG. Vitamin retention in cook/chill and cook/hot-hold hospital food-services. *J Am Diet Assoc*. 1996, 96: 490-498. 10.1016/S0002-8223(96)00135-6.

**Funding/Support:**

Dr S Yusuf is supported by the Mary W Burke endowed chair of the Heart and Stroke Foundation of Ontario.

The PURE Study is an investigator-initiated study that is funded by the Population Health Research Institute, the Canadian Institutes of Health Research, Heart and Stroke Foundation of Ontario, Support from CIHR's Strategy for Patient Oriented Research, through the Ontario SPOR Support Unit, as well as the Ontario Ministry of Health and Long-Term Care and through unrestricted grants from several pharmaceutical companies [with major contributions from Astra Zeneca (Canada), Sanofi-Aventis (France and Canada), Boehringer Ingelheim (Germany & Canada), Servier, and GSK], and additional contributions from Novartis and King Pharma and from various national or local organizations in participating countries.

These include: **Argentina:** Fundacion ECLA; **Bangladesh:** Independent University, Bangladesh and Mitra and Associates; **Brazil:** Unilever Health Institute, Brazil; **Canada:** Public Health Agency of Canada and Champlain Cardiovascular Disease Prevention Network; **Chile:** Universidad de la Frontera; **China:** National Center for Cardiovascular Diseases; **Colombia:** Colciencias, Grant number:6566-04-18062; **India:** Indian Council of Medical Research; **Malaysia:** Ministry of Science, Technology and Innovation of Malaysia Grant Nbr 100 - IRDC / BIOTEK 16/6/21 (13/2007), Grant Number 07-05-IFN-BPH 010, Ministry of Higher Education of Malaysia Grant Nbr 600 - RMI/LRGS/5/3 (2/2011), Universiti Teknologi MARA, Universiti Kebangsaan Malaysia (UKM-Hejimi-Komuniti-15-2010); **occupied Palestinian territory:** the United Nations Relief and Works Agency for Palestine Refugees in the Near East (UNRWA), occupied Palestinian territory; International Development Research Centre (IDRC), Canada; **Philippines:** Philippine Council for Health Research & Development (PCHRD); **Poland:** Polish Ministry of Science and Higher Education grant Nr 290/W-PURE/2008/0, Wroclaw Medical University; **Saudi Arabia:** The Deanship of Scientific Research at King Saud University, Riyadh, Saudi Arabia (Research group number: RG -1436-013); **South Africa:** The North-West University, SANPAD (SA and Netherlands Programme for Alternative Development), National Research Foundation, Medical Research Council of SA, The SA Sugar Association (SASA), Faculty of Community and Health Sciences (UWC); **Sweden:** Grants from the Swedish state under the Agreement concerning research and education of doctors; the Swedish Heart and Lung Foundation; the Swedish Research Council; the Swedish Council for Health, Working Life and Welfare, King Gustaf V:s and Queen Victoria Freemasons Foundation, AFA Insurance, Swedish Council for Working Life and Social Research, Swedish Research Council for Environment, Agricultural Sciences and Spatial Planning, Grant from the Swedish State under (LäkarUtbildningsAvtalet) Agreement, Grant from the Västra Götaland Region (FOUU); **TURKEY:** Metabolic Syndrome Society, Astra Zeneca, Turkey, Sanofi Aventis, Turkey; **UAE:** Sheikh Hamdan Bin Rashid Al Maktoum Award For Medical Sciences and Dubai Health Authority, Dubai UAE.

**Role of Sponsor:** The funders and sponsors had no role in the design and conduct of the study; in the collection, analysis, and interpretation of the data; in the preparation, review, or approval of the manuscript; or in the decision to submit the manuscript for publication.

## **PURE Project Office Staff, National Coordinators, Investigators, and Key Staff:**

**Project office (Population Health Research Institute, Hamilton Health Sciences and McMaster University, Hamilton, Canada):** S Yusuf\* (Principal Investigator).

S Rangarajan (Project Manager); K K Teo, C K Chow, M O'Donnell, A Mente, D Leong, A Smyth, P Joseph, A Merchant, S Islam (Statistician), M Zhang (Statistician), W Hu (Statistician), C Ramasundarahettige (Statistician), G Wong (Statistician), S Bangdiwala, L Dyal, A Casanova, M Dehghan (Nutrition Epidemiologist), G Lewis, A Aliberti, A Arshad, A Reyes, A Zaki, B Lewis, B Zhang, D Agapay, D Hari, E Milazzo, E Ramezani, F Hussain, F Shifaly, G McAlpine, I Kay, J Lindeman, J Rimac, J Swallow, L Heldman, M(a) Mushtaha, M(o) Mushtaha, M Trottier, M Riggi, N Aoucheva, N Kandy, P Mackie, R Solano, S Chin, S Ramacham, S Shahrook, S Trottier, T Tongana, W ElSheikh, Y Iyengar.

**Core Laboratories:** M McQueen, K Hall, J Keys (Hamilton), X Wang (Beijing, China), J Keneth, A Devanath (Bangalore, India).

**Argentina:** R Diaz\*, A Orlandini, B Linetsky, S Toscanelli, G Casaccia, JM Maini Cuneo; **Bangladesh:** O Rahman\*, R Yusuf, AK Azad, KA Rabbani, HM Cherry, A Mannan, I Hassan, AT Talukdar, RB Tooheen, MU Khan, M Sintaha, T Choudhury, R Haque, S Parvin; **Brazil:** A Avezum\*, GB Oliveira, CS Marcilio, AC Mattos; **Canada:** K Teo\*, S Yusuf\*, J Dejesus, D Agapay, T Tongana, R Solano, I Kay, S Trottier, J Rimac, W Elsheikh, L Heldman, E Ramezani, G Dagenais, P Poirier, G Turbide, D Auger, A LeBlanc De Bluts, MC Proulx, M Cayer, N Bonneville, S Lear, D Gasevic, E Corber, V de Jong, I Vukmirovich, A Wielgosz, G Fodor, A Pipe, A Shane; **CHILE:** F Lanas\*, P Seron, S Martinez, A Valdebenito, M Oliveros; **CHINA:** Li Wei\*, Liu Lisheng\*, Chen Chunming, Wang Xingyu, Zhao Wenhua, Zhang Hongye, JiaXuan, Hu Bo, Sun Yi, Bo Jian, Zhao Xiuwen, Chang Xiaohong, Chen Tao, Chen Hui, Chang Xiaohong, Deng Qing, Cheng Xiaoru, Deng Qing, He Xinye, Hu Bo, JiaXuan, Li Jian, Li Juan, Liu Xu, Ren Bing, Sun Yi, Wang Wei, Wang Yang, Yang Jun, Zhai Yi, Zhang Hongye, Zhao Xiuwen, Zhu Manlu, Lu Fanghong, Wu Jianfang, Li Yindong, Hou Yan, Zhang Liangqing, Guo Baoxia, Liao Xiaoyang, Zhang Shiyang, BianRongwen, TianXiuzhen, Li Dong, Chen Di, Wu Jianguo, Xiao Yize, Liu Tianlu, Zhang Peng, Dong Changlin, Li Ning, Ma Xiaolan, Yang Yuqing, Lei Rensheng, Fu Minfan, He Jing, Liu Yu, Xing Xiaojie, Zhou Qiang, ; **Colombia:** P Lopez-Jaramillo\*, PA Camacho Lopez, R Garcia, LJA Jurado, D Gómez-Arbeláez, JF Arguello, R Dueñas, S Silva, LP Pradilla, F Ramirez, DI Molina, C Cure-Cure, M Perez, E Hernandez, E Arcos, S Fernandez, C Narvaez, J Paez, A Sotomayor, H Garcia, G Sanchez, T David, A Rico; **India:** P Mony \*, M Vaz\*, A V Bharathi, S Swaminathan, K Shankar AV Kurpad, KG Jayachitra, N Kumar, HAL Hospital, V Mohan, M Deepa, K Parthiban, M Anitha, S Hemavathy, T Rahulashankiruthiyayan, D Anitha, K Sridevi, R Gupta, RB Panwar, I Mohan, P Rastogi, S Rastogi, R Bhargava, R Kumar, J S Thakur, B Patro, PVM Lakshmi, R Mahajan, P Chaudary, V Raman Kutty, K Vijayakumar, K Ajayan, G Rajasree, AR Renjini, A Deepu, B Sandhya, S Asha, HS Soumya; **Iran:** R Kelishadi\*, A Bahonar, N Mohammadifard, H Heidari; **Malaysia:** K Yusoff\*, TST Ismail, KK Ng, A Devi, NM Nasir, MM Yasin, M Miskan, EA Rahman, MKM Arsad, F Ariffin, SA Razak, FA Majid, NA Bakar, MY Yacob, N Zainon, R Salleh, MKA Ramli, NA Halim, SR Norlizan, NM Ghazali, MN Arshad, R Razali, S Ali, HR Othman, CWJCW Hafar, A Pit, N Danuri, F Basir, SNA Zahari, H Abdullah, MA Arippin, NA Zakaria, I

Noorhassim, MJ Hasni, MT Azmi, MI Zaleha, KY Hazdi, AR Rizam, W Sazman, A Azman; **OCCUPIED PALESTINIAN TERRITORY:** R Khatib\*, U Khammash, A Khatib, R Giacaman; **PAKISTAN:** R Iqbal\*, A Afridi, R Khawaja, A Raza, K Kazmi; **PHILIPPINES:** A Dans\*, HU Co, JT Sanchez, L Pudol, C Zamora-Pudol, LAM Palileo-Villanueva, MR Aquino, C Abaquin, SL Pudol, ML Cabral; **Poland:** W Zatonski\*, A Szuba, K Zatonska, R Ilow<sup>#</sup>, M Ferus, B Regulska-Ilow, D Róžańska, M Wolyniec; **SAUDI ARABIA:** KF AlHabib\*, A Hersi, T Kashour, H Alfaleh, M Alshamiri, HB Altaradi, O Alnobani, A Bafart, N Alkamel, M Ali, M Abdulrahman, R Nouri; **South Africa:** A Kruger\*, H H Voster, A E Schutte, E Wentzel-Viljoen, FC Eloff, H de Ridder, H Moss, J Potgieter, AA Roux, M Watson, G de Wet, A Olckers, JC Jerling, M Pieters, T Hoekstra, T Puoane, E Igumbor, L Tsolekile, D Sanders, P Naidoo, N Steyn, N Peer, B Mayosi, B Rayner, V Lambert, N Levitt, T Kolbe-Alexander, L Ntyintyane, G Hughes, R Swart, J Fourie, M Muzigaba, S Xapa, N Gobile, K Ndayi, B Jwili, K Ndibaza, B Egbujie; **SWEDEN:** A Rosengren\*, K Bengtsson Boström, A Gustavsson, M Andreasson, M Snällman, L Wirdemann; **TANZANIA:** K Yeates\*, J Sleeth, K Kilonzo; **TURKEY:** A Oguz\*, N Imeryuz, Y Altuntas, S Gulec, A Temizhan, K Karsidag, KBT Calik, AAK Akalin, OT Caklili, MV Keskinler, AN Erbakan; **UNITED ARAB EMIRATES:** AM Yusufali\*, W Almahmeed, H Swidan, EA Darwish, ARA Hashemi, N Al-Khaja, JM Muscat-Baron, SH Ahmed, TM Mamdouh, WM Darwish, MHS Abdelmotagali, SA Omer Awed, GA Movahedi, F Hussain, H Al Shaibani, RIM Gharabou, DF Youssef, AZS Nawati, ZAR Abu Salah, RFE Abdalla, SM Al Shuwaihi, MA Al Omairi, OD Cadigal; R.S. Alejandrino; **Zimbabwe:** J Chifamba\*, L Gwaunza, G Terera, C Mahachi, P Murambiwa, T Machiweni, R Mapanga.

\*National Coordinator

<sup>#</sup> Deceased
